# Supplementary material for: TFEB controls vascular development by regulating the proliferation of endothelial cells
Source: PubMed Central journal article supplement — EMBO J. 2018 Dec 27;38(3):e98250. doi: 10.15252/embj.201798250 (PMC6356157; doi:10.15252/embj.201798250), 2018-12-27
Supplement: EMBJ-38-e98250-s001.pdf [file EMBJ-38-e98250-s001.pdf]

**Appendix files of Manuscript:**

**TFEB controls vascular development by regulating the proliferation of endothelial cells.**

**Table of content:**

Appendix figure S1

Appendix figure S2

Appendix figure S3

Appendix figure legends

Appendix material and methods

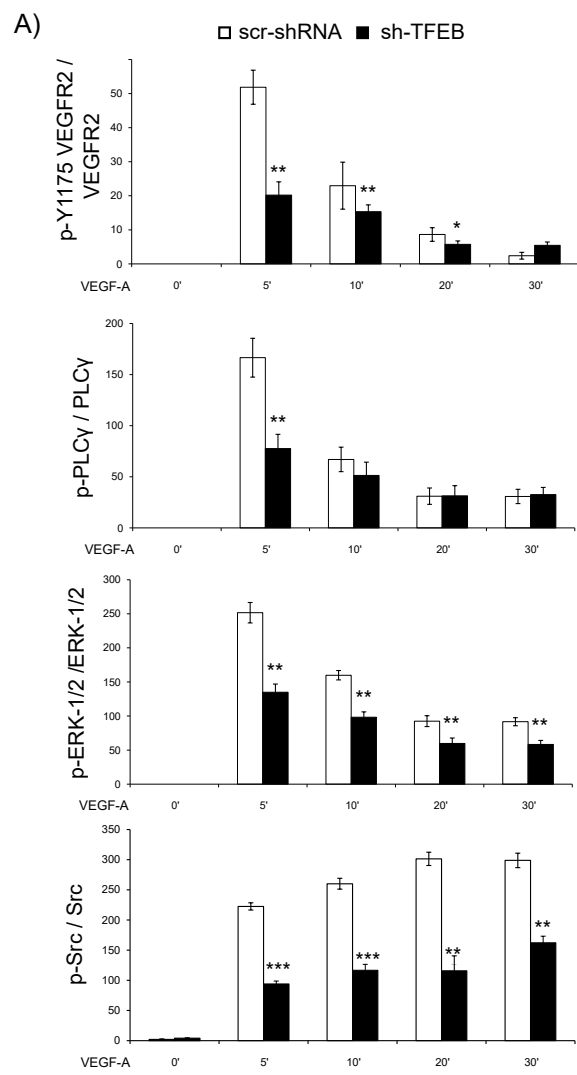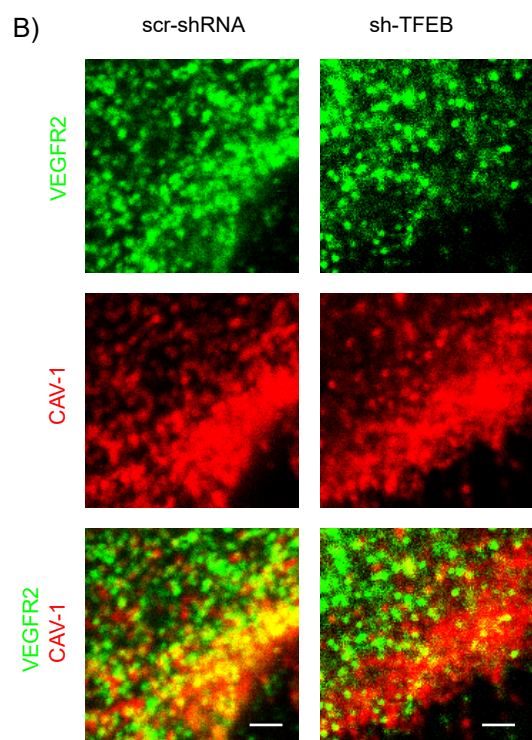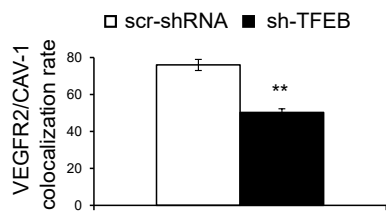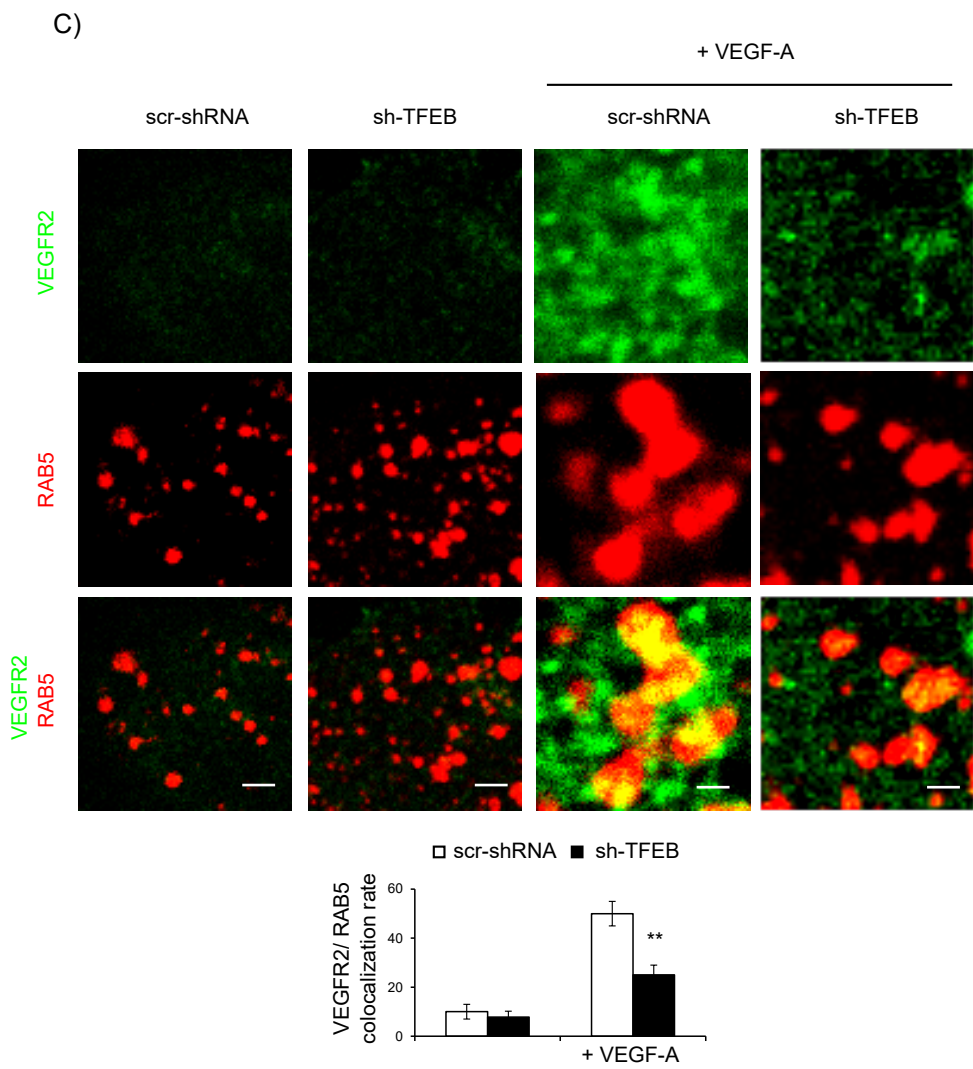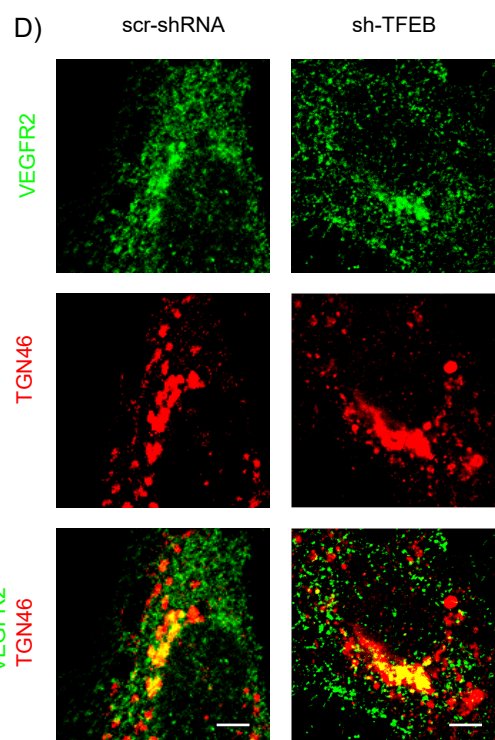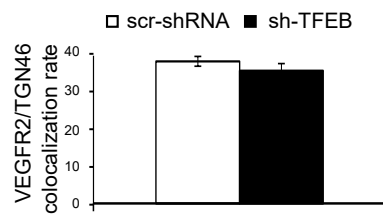

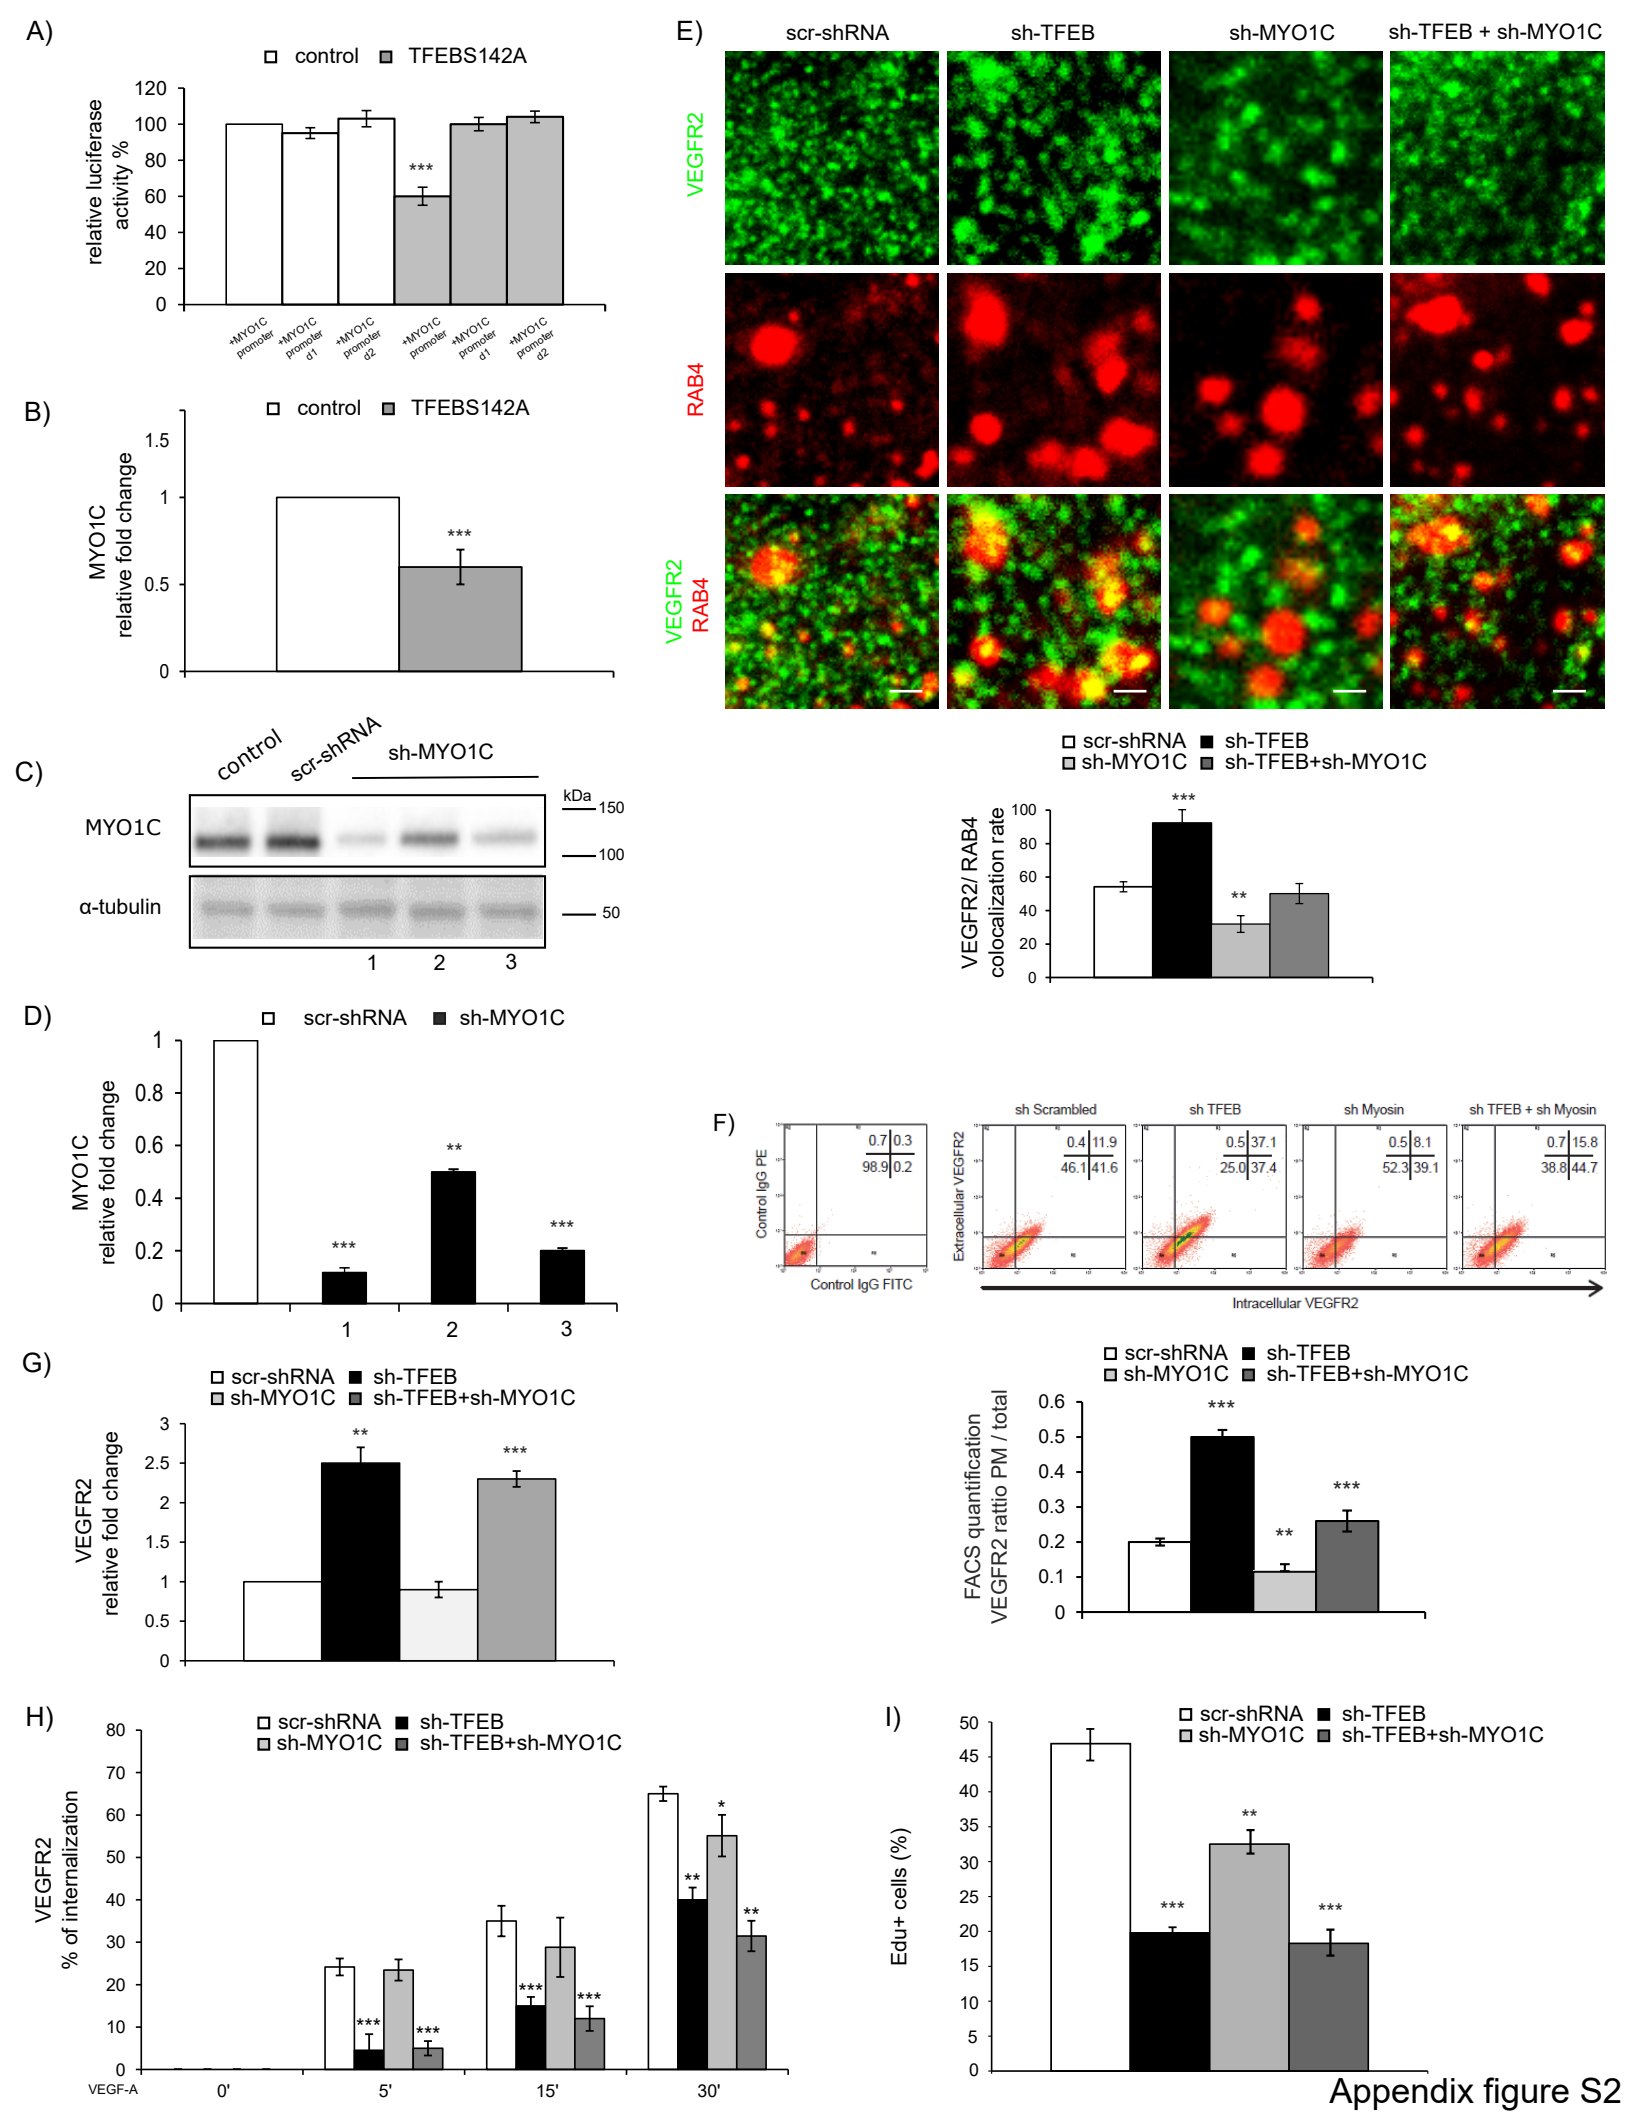

A)

| microRNA name | Pre-miRNA considered                  | Function                                  | Intragenic | Host gene                      | Same strand with respect to the host gene | VEGFR2 validated target | Significant TFEB binding peak(s) in the putative core promoter region of the host gene |
|---------------|---------------------------------------|-------------------------------------------|------------|--------------------------------|-------------------------------------------|-------------------------|----------------------------------------------------------------------------------------|
| miR-126       | mir-126                               | ANGIOGENESIS                              | yes        | ENSG00000172889, EGFL7         | yes                                       | no                      |                                                                                        |
| miR-218       | mir-218-1                             | ANGIOGENESIS                              | yes        | ENSG00000145147, SLIT2         | yes                                       | no                      |                                                                                        |
|               | mir-218-2                             | ANGIOGENESIS                              | yes        | ENSG00000184347, SLIT3         | yes                                       | no                      |                                                                                        |
| miR-17/18/20  | MIR17HG (miR-17-92 cluster host gene) | ANGIOGENESIS                              | no         |                                |                                           |                         |                                                                                        |
|               | MIR18B / MIR20B cluster               | ANGIOGENESIS                              | no         |                                |                                           |                         |                                                                                        |
|               | MIR18B / MIR20B cluster               | ANGIOGENESIS                              | no         |                                |                                           |                         |                                                                                        |
| miR-19a       | MIR17HG (miR-17-92 cluster host gene) | ANGIOGENESIS                              | no         |                                |                                           |                         |                                                                                        |
| miR-92a       | MIR17HG (miR-17-92 cluster host gene) | ANGIOGENESIS                              | no         |                                |                                           |                         |                                                                                        |
| miR-23/27     | MIR23A / MIR27A / MIR24 cluster       | ANGIOGENESIS                              | no         |                                |                                           |                         |                                                                                        |
|               | MIR23A / MIR27A / MIR24 cluster       | ANGIOGENESIS                              | no         |                                |                                           |                         |                                                                                        |
| miR-24        | MIR23A / MIR27A / MIR24 cluster       | ANGIOGENESIS                              | no         |                                |                                           |                         |                                                                                        |
|               | MIR3074 (MIR-24-1 precursor)          | ANGIOGENESIS                              | no         |                                |                                           |                         |                                                                                        |
| miR-16/424    | MIR16-1                               | MICRORNA MODULATED BY ANGIOGENIC FACTORS  | yes        | ENSG00000231607, DLEU2         | yes                                       | yes                     | yes                                                                                    |
|               | MIR15B / MIR16-2 cluster              | MICRORNA MODULATED BY ANGIOGENIC FACTORS  | yes        | ENSG00000113810, SMC4          | yes                                       | yes                     | no                                                                                     |
|               | MIR503HG / MIR450 / MIR542 cluster    | MICRORNA MODULATED BY ANGIOGENIC FACTORS  | no         |                                |                                           |                         |                                                                                        |
| miR-132       | MIR132                                | MICRORNA MODULATED BY ANGIOGENIC FACTORS  | no         |                                |                                           |                         |                                                                                        |
| miR-221/22    | MIR221 / MIR222 cluster               | MICRORNA MODULATED BY ANGIOGENIC FACTORS  | yes        | ENSG00000270069, RP6-99M1.2    | yes                                       | no                      |                                                                                        |
| miR-210       | MIR210HG cluster                      | ISCHEMIA-INDUCED microRNAs                | no         |                                |                                           |                         |                                                                                        |
| miR-503       | MIR503HG / MIR450 / MIR542 cluster    | ISCHEMIA-INDUCED microRNAs                | no         |                                |                                           |                         |                                                                                        |
| miR-424       | MIR503HG / MIR450 / MIR542 cluster    | ISCHEMIA-INDUCED microRNAs                | no         |                                |                                           |                         |                                                                                        |
| miR-21        | MIR21                                 | microRNAs IN ENDOTHELIAL PROGENITOR CELLS | no         |                                |                                           |                         |                                                                                        |
| miR-217       | MIR217                                | microRNAs INVOLVED IN SENESCENCE          | yes        | ENSG00000226702, C011306.2     | no                                        |                         |                                                                                        |
| miR-146a      | MIR146A                               | microRNAs INVOLVED IN SENESCENCE          | no         |                                |                                           |                         |                                                                                        |
| miR-497       | MIR497HG                              | Tu et al. 2015                            | yes        | ENSG00000267047, RP11-589P10.7 | yes                                       | no                      |                                                                                        |

B)

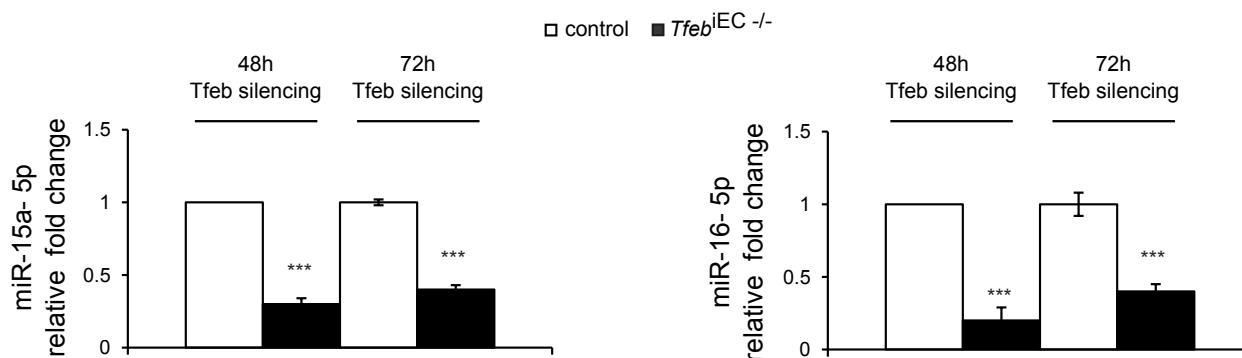

C)

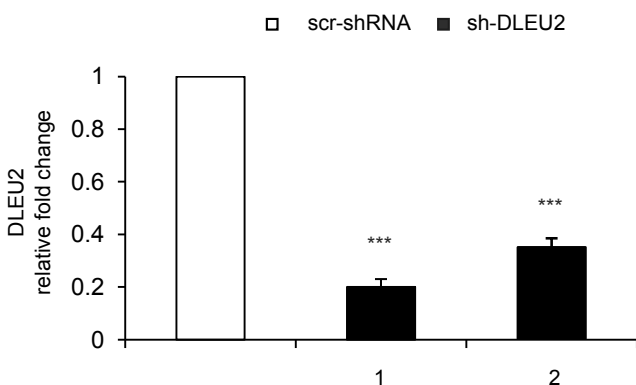

D)

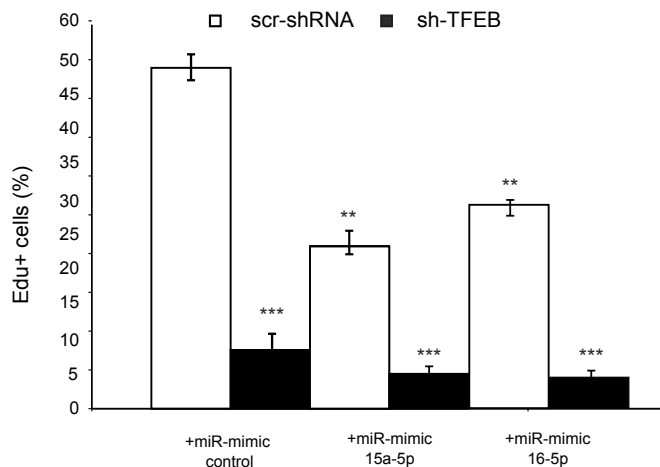

## APPENDIX FIGURE LEGENDS

### Appendix figure S1. TFEB silencing and VEGFR2 activity and localization in human ECs.

(A) Densitometric analysis of immunoblot of total lysates from human scr-shRNA and sh-TFEB ECs (after VEGF-A stimulation, 30 ng/ml) probed with anti-pY1175 VEGFR2, anti-VEGFR2, anti-PLC $\gamma$ , anti-p-PLC $\gamma$ , anti-ERK-1/2, anti-p-ERK1/2, anti-p-Src, anti-Src and anti- $\alpha$ -tubulin Abs. The bar graphs show the densitometric analyses after normalization with  $\alpha$ -tubulin as ratio of p-Y1175 (n=3, mean $\pm$ SEM; ANOVA p<0.0001; \*p<0.001 and \*\*p<0.001 *versus* scr-shRNA by Bonferroni post-test), p-PLC $\gamma$  (n=3, mean $\pm$ SEM; ANOVA p<0.0001; \*\*p<0.001 *versus* scr-shRNA by Bonferroni post-test), p-ERK-1/2 (n=3, mean $\pm$ SEM; ANOVA p<0.0001; \*\*p<0.0001 *versus* scr-shRNA by Bonferroni post-test), p-Src (n=3, mean $\pm$ SEM; ANOVA p<0.0001; \*\*p<0.0001 and \*\*\*p<0.0001 *versus* scr-shRNA by Bonferroni post-test) *versus* total VEGFR2, PLC $\gamma$ , ERK-1/2 and Src.

(B) *TFEB* silencing alters VEGFR2 localization into caveolae in human ECs. Representative immunofluorescence images of human scr-shRNA and sh-TFEB ECs after staining with anti-VEGFR2 and anti-CAV-1 Abs (scale bar: 10  $\mu$ m). Bar graphs show the colocalization rate of VEGFR2 and CAV-1 (n=40, mean $\pm$ SEM; \*\*p<0.0001 *versus* scr-shRNA by Student's *t*-test).

(C) *TFEB* silencing alters VEGFR2 localization into Rab5+ endosomes in human ECs. Representative immunofluorescence images of antibody feeding assay with anti-VEGFR2 and anti-Rab5 Abs (scale bar: 10  $\mu$ m) in absence or presence of VEGF-A (30 ng/ml) stimulation. Bar graphs show the colocalization rate of VEGFR2 and Rab5 in human scr-shRNA and sh-TFEB ECs (n=15, mean $\pm$ SEM; \*\*p<0.0001 *versus* scr-shRNA by Student's *t*-test).

(D) *TFEB* silencing and VEGFR2 localization into Golgi in human ECs. Representative immunofluorescence images of VEGFR2 and Golgi colocalization in human scr-shRNA and sh-*TFEB* ECs obtained by staining with anti-VEGFR2 and anti-TGN46 Abs (scale bar: 10  $\mu$ m). Bar graphs show the colocalization rate of VEGFR2 and TGN46 (n=15, mean $\pm$ SEM; p=ns *versus* scr-shRNA by Student's *t*-test).

### **Appendix figure S2. Role of *MYO1C* silencing on *TFEB* effects in ECs.**

(A) Analysis of *TFEB* modulation of *MYO1C* promoter in human ECs. Bar graph shows the relative luciferase activity % evaluated in control and *TFEB*S142A human ECs after transfection of *MYO1C* promoter, *MYO1C* promoter d1 and *MYO1C* promoter d2 (n=3, mean $\pm$ SEM; \*\*\*p<0.0001 by Student's *t*-test).

(B) qPCR of *MYO1C* expression in control and *TFEB*S142A human ECs. Data are expressed as relative fold change compared with the expression in control ECs after normalization to the housekeeping gene TBP (n=3, mean $\pm$ SEM; \*\*\*p <0.0001 by Student's *t*-test).

(C,D) Characterization of *MYO1C* shRNA (n=3). (C) Western blot of *MYO1C* in human ECs carrying 3 different commercial sh-*MYO1C* RNAs (1-3) or the appropriate control (scr-shRNA) transduced by pLKO lentivirus vector. (D) *MYO1C* mRNA expression analyzed by qPCR in ECs carrying the different *MYO1C* shRNAs (1-3). Data are expressed as relative fold-change compared with scr-shRNA after normalization to the housekeeping gene TBP (n=3, mean $\pm$ SEM; \*\*p<0.001, \*\*\*p<0.0001 by Student's *t*-test).

(E) *TFEB* silencing and VEGFR2 localization into Rab4+ endosome in human ECs. Representative immunofluorescence images of VEGFR2 and Rab4 colocalization obtained by scr-shRNA, sh-*TFEB*, sh-*MYO1C* and sh-*TFEB*+sh-*MYO1C* human ECs staining with anti-VEGFR2 and anti-Rab4 Abs (scale bar: 10  $\mu$ m). Bar graphs show the colocalization

rate of VEGFR2 and Rab4 (n=15, mean±SEM; \*\*p <0.001, \*\*\*p <0.0001 *versus* scr-shRNA by Student's *t*-test).

(F) Cell distribution of VEGFR2. FACS analysis with anti-VEGFR2 antibody was performed in scr-shRNA, sh-TFEB, sh-MYO1C and sh-TFEB+sh-MYO1C human ECs. 1 representative experiment out of 3; % of the extracellular and intracellular protein is indicated). Data are expressed as ratio PM and total VEGFR2 (n=3, mean±SEM; \*\*p<0.001 and \*\*\*p<0.0001 by Student's *t*-test).

(G) qPCR of *VEGFR2* expression in scr-shRNA, sh-TFEB, sh-MYO1C and sh-TFEB+sh-MYO1C human ECs. Data are expressed as relative fold change compared with scr-shRNA ECs after normalization for housekeeping gene TBP (n=3, mean±SEM; \*\*p<0.001 and \*\*\*p<0.0001 by Student's *t*-test).

(H) *MYO1C* silencing does not modify VEGFR2 internalization. Bar graph of VEGFR2 internalization expressed as the percent of internalized VEGFR2 *versus* PM VEGFR2 after VEGF-A stimulation in scr-shRNA, sh-TFEB, sh-MYO1C and sh-TFEB+sh-MYO1C human ECs (n=6, mean±SEM, ANOVA p<0.0001; \*p<0.0001, \*\*p<0.0001 and \*\*\*p<0.0001 *versus* scr-shRNA by Bonferroni post-tests).

(I) *MYO1C* silencing does not modified EC proliferation. Representative graph of scr-shRNA, sh-TFEB, sh-MYO1C and sh-TFEB+sh-MYO1C human ECs treated for 24 hours with VEGF-A (30 ng/ml). DNA incorporation of EdU was detected by flow cytometry. The percentage of proliferating cells is indicated (n=4, mean±SEM; \*\*p<0.001, \*\*\*p<0.0001 *versus* scr-shRNA ECs by Student's *t*-test).

### **Appendix figure S3. *TFEB* indirectly regulates VEGFR2 expression**

(A) Table of angiogenesis-associated miRs and their correlation with TFEB in ECs.

(B) Expression of miR-15a and 16 isoforms in by qPCR (n=3, mean±SEM). *Tfeb* deletion in murine ECs down-regulates miR-15a-5p and miR-16-5p. qPCR of miR-15a-5p and miR-16-

5p in lung ECs obtained from control and *Tfeb*<sup>EC-/-</sup> mice in which *Tfeb* was silenced for 48h or 72h by in vitro treatment with 4-OH-tamoxifene (5  $\mu$ M for 48 or 72 h). Data are expressed as relative fold-change compared with the expression in ECs derived from control mice after normalization to the housekeeping gene U6 (n=3, mean $\pm$ SEM; \*\*\*p<0.0001 by Student's *t*-test).

(C) Characterization of DLEU2 shRNA (n=3). *DLEU2* mRNA expression analyzed by qPCR in human ECs carrying 2 different commercial sh-DLEU2 RNAs (1,2) or the appropriate control (scr-shRNA) transduced by pLKO lentivirus vector. Data are expressed as relative fold-change compared with scr-shRNA after normalization to the housekeeping gene TBP (n=3, mean $\pm$ SEM; \*\*\*p<0.0001 by Student's *t*-test).

(D) miR15a-5p and miR-16-5p not modified EC proliferation after TFEB silencing. Representative graph of human scr-shRNA, sh-TFEB ECs proliferation after transduction with miR-control, miR-15a-5p and miR-16-5p mimics and after stimulation with VEGF-A (30 ng/ml, 24h). DNA incorporation of EdU was detected by flow cytometry. The percentage of proliferating cells is indicated (n=4, mean $\pm$ SEM; \*\*p<0.0001, \*\*\*p<0.0001 *versus* scr-shRNA ECs



## Appendix Material and Methods

### *Reagents*

Wizard SV Genomic DNA Purification System, GoTaq G2 Hot Start Polymerase and The Dual-Luciferase® Reporter (DLR™) Assay System (Promega Corporation); Dynabeads Protein G, Power SYBR Green PCR Master Mix, Phusion Site-Directed Mutagenesis Kit, Lipofectamine® RNAiMAX Reagent, Click-iT® EdU Flow Cytometry Cell Proliferation Assay, Illumina TotalPrep RNA Amplification Kit, pMCS-CypridiLuc\_AC167\_MYO1C\_promoter, pMCS-CypridiLuc\_AC167\_MYO1C\_promoter\_d1 pMCS-CypridiLuc\_AC167\_MYO1C\_promoter\_d2, pMCV-GreenReLuc, Lipofectamine® RNAiMAX Reagent, Cypridina Luciferase Glow Assay Kit, Pierce Renilla Luciferase Glow Assay Kit, High Capacity cDNA Reverse Transcription kit, Taqman PCR Universal MasterMix, Taqman assays, SYBR GreenER kit, EZ-Link™ Sulfo-NHS-SS-Biotin, Maxisorp 96-well plates, phalloidin-555 and DAPI (Thermo Fisher Scientific); shRNA against *DLEU2* (Dharmacon); mirVana™ miRNA control and inhibitors or mimics (Ambion); hypoxyprobe-1-FITC-conjugated antibody (Chemicon); collagenase/dispase (Roche); miRNeasy Mini Kit and QIAquick PCR Purification Kit (Qiagen); NextSeq 500 Illumina sequencer and HumanHT-12 v4.0 Expression Bead Chip GenomeStudio software V2011.01 (Illumina); NEBNext® CHIP-Seq Library Prep Reagent Set for Illumina (New England Biolabs); CDK4-luciferase full length and CDK4-luciferase fragment A (Addgene); IntraPrep kit (Beckman Coulter); IgG (12-370, Millipore); human VEGF-A (R&D System); streptavidin-agarose beads (Upstate Biotechnology), Growth Factor Reduced Matrigel (Corning). Other reagents, if not indicated, were from Sigma Aldrich.

### *Mouse genotyping*

Mouse genotypes were analyzed by PCR with genomic DNA from yolk sacs, embryos and tail samples. DNA was extracted using the Wizard SV Genomic DNA Purification System. PCR reactions were performed using appropriate primers for specific PCR samples with a commercial kit (GoTaq G2 Hot Start Polymerase). The following primers used for genotyping:

Tfeb: 5'-CAGCCCCTTACCAGCGTCCC-3' and 5'-GGGTGCAATCTAATCAGGGGGC-3';

Tfeb delta allele: 5'-GTAGAACTGAGTCAAGGCATACTGG-3' and 5'-GGGTGCAATCTAATCAGGGGGC-3';

Cdh5-Cre-ER<sup>T2</sup>: 5'-GCCTGCATTACCGGTCGATGCAACGA-3' and 5'-GTGGCAGATGGCGCGGCAACACCATT-3';

Tie2-Cre: 5'-GCCTGCATTACCGGTCGATGCAACGA-3' and 5'-GTGGCAGATGGCGCGGCAACACCATT-3';

Tfeb-EGFP: 5'-CTGTATAGCACTGGCTCTGTAGACC-3' and 5'-GGTGGTGGGAATGGAAACC-3'.

### *Real-time PCR*

Extracted RNA was converted to cDNA using a High Capacity cDNA Reverse Transcription kit. Real-time PCR was performed on a CFX96 system (Bio-Rad) using Taqman PCR Universal MasterMix and specific Taqman assays. Experiments were performed in triplicate. TBP, RNU44 and U6 were used as reference genes.

The following Taqman assays were used: TFEB (human, Hs00292981\_m1, mouse, Mm00448968\_m1); CDK4 (human Hs00364847\_m1, mouse Mm00726334\_s1); E2F2 (human Hs00918090\_m1, mouse Mm01192124\_m1); E2F4 (human Hs00608098\_m1, mouse Mm01247763\_m1), E2F1 (human Hs00153451\_m1, mouse Mm00432939\_m1); CCNA1 (human Hs00171105\_m1); CCNA2 (human Hs00996788\_m1); CCNE2 (human

Hs00180319\_m1); CDCA4 (human Hs00937497\_s1); CDCA7 (human Hs00230589\_m1); CDT1 (human Hs00925491\_g1, mouse Mm00466006\_m1); CDC25B (human Hs01582335\_m1); CDCA5 (human Hs00969392\_g1); PCNA (human Hs00427214\_g1, mouse Mm00448100\_g1); VEGFR2 (human Hs00911700\_m1, mouse Mm01222421\_m1); DLEU2 (human Hs00863925\_m1, mouse Mm01319189\_m1); MYO1C (Hs00300761\_m1); miR-15a-3p (002419); miR-15a-5p (000389); miR-16-1-3p (002420); miR-16-5p (000391); TBP (human Hs00427620, mouse Mm\_00446971); RNU44 (001094); and U6 (001973).

For the ChIP experiments, immunoprecipitated DNA was analyzed by qPCR using a SYBR GreenER kit. The oligonucleotide sequences of the gene promoters were as follows: VEGFR2 5'- CCAACGAAGAGCCCTAGTGA-3' and 5'-ACCAGAAGGAACGAATGTGG-3'; DLEU2 5'-TTTGTGCAGTTTCAGCAAAG-3' and 5'-CTGTGTACTIONTAGGTCGTGTG-3'; and SMC4 5' CTGAAGAGGCGTTTCTGGAC-3' and 5'-GGAAGAGCGAGGGATTCTTT-3'; CDK4 5'- TGTGATAGCAACAGATCACG-3' and 5'- GTTCCTACGGCCCCATAC-3'.

## DEGs shTFEB vs scr-shRNA ECs

| ID        | logFC        | P.Value     | adj.P.Val   |
|-----------|--------------|-------------|-------------|
| SRM       | -2,048792018 | 3,43093E-08 | 0,000302239 |
| SRP72     | -1,798388784 | 3,86841E-08 | 0,000302239 |
| APEX2     | -1,635916211 | 5,81363E-08 | 0,000302813 |
| TMEM123   | -1,463902393 | 8,01245E-08 | 0,000313006 |
| FAF2      | -1,476758216 | 1,02001E-07 | 0,000318773 |
| AES       | -1,520757255 | 2,47114E-07 | 0,000643568 |
| GRN       | -1,389650848 | 4,73527E-07 | 0,000940215 |
| DCXR      | -1,556828299 | 4,81359E-07 | 0,000940215 |
| MLLT6     | -1,17956     | 7,55622E-07 | 0,001311928 |
| LSM12     | -1,193611561 | 8,85449E-07 | 0,001383603 |
| ITGA5     | -1,577157949 | 1,12944E-06 | 0,001452066 |
| SLC25A22  | -1,211121829 | 1,12981E-06 | 0,001452066 |
| MKRN1     | -1,169573453 | 1,22351E-06 | 0,001452066 |
| KATNB1    | -1,144669628 | 1,30097E-06 | 0,001452066 |
| SAC3D1    | -1,361511204 | 2,17313E-06 | 0,001987978 |
| SLC7A5    | -1,407839591 | 2,2019E-06  | 0,001987978 |
| STK40     | -1,191393782 | 2,20258E-06 | 0,001987978 |
| AURKA     | -1,421079127 | 2,3009E-06  | 0,001987978 |
| NINJ1     | -1,073818038 | 2,41723E-06 | 0,001987978 |
| CCL2      | 2,1788295    | 2,70455E-06 | 0,002035279 |
| CDK4      | -1,114917257 | 2,73524E-06 | 0,002035279 |
| DDX56     | -1,055534286 | 2,94329E-06 | 0,002090537 |
| HS.497591 | -1,346550647 | 3,62869E-06 | 0,002465304 |
| PIK3R2    | -0,997017945 | 4,15448E-06 | 0,002689756 |
| RAPGEF1   | -1,019256046 | 4,30333E-06 | 0,002689756 |
| SUV39H1   | -1,458253426 | 4,58045E-06 | 0,002752851 |
| NADK      | -0,965808911 | 5,06905E-06 | 0,002874269 |
| PABPC4    | -1,034765446 | 5,15036E-06 | 0,002874269 |
| SERBP1    | -1,03870265  | 5,52742E-06 | 0,002978324 |
| PI4KB     | -1,031815092 | 5,97087E-06 | 0,003110026 |
| MED16     | -1,071761688 | 6,40902E-06 | 0,003230559 |
| GTSE1     | -1,419308994 | 7,00759E-06 | 0,003319763 |
| CCM2      | -0,910036894 | 7,09909E-06 | 0,003319763 |
| SMPD1     | -1,147274178 | 7,22334E-06 | 0,003319763 |
| ADRBK1    | -1,252214372 | 7,82215E-06 | 0,003362352 |
| PPP1R14B  | -1,186202359 | 7,83774E-06 | 0,003362352 |
| GATAD2A   | -0,97274953  | 7,96154E-06 | 0,003362352 |
| ATP1B1    | -1,300485223 | 8,31667E-06 | 0,003419903 |
| CTDSP2    | -1,212830248 | 8,9398E-06  | 0,003581881 |
| SRPR      | -1,326488384 | 9,28835E-06 | 0,003628492 |
| RND1      | 1,087003757  | 1,01877E-05 | 0,003720105 |
| DCP2      | 1,100967768  | 1,04244E-05 | 0,003720105 |
| TBC1D13   | -1,08278976  | 1,0444E-05  | 0,003720105 |
| TK1       | -1,68538161  | 1,04751E-05 | 0,003720105 |
| CHMP1A    | -1,063622295 | 1,21288E-05 | 0,004199097 |
| PLAGL2    | -0,97492323  | 1,23614E-05 | 0,004199097 |
| PPIH      | -1,64245125  | 1,30262E-05 | 0,004330786 |
| CDCA7     | -1,127405774 | 1,60971E-05 | 0,005240279 |
| SMTN      | -1,378699382 | 1,7533E-05  | 0,005591237 |
| VCP       | -0,974352274 | 1,90232E-05 | 0,005852942 |
| TMED7     | -0,836836862 | 2,0078E-05  | 0,005852942 |
| PPRC1     | -1,017780436 | 2,03406E-05 | 0,005852942 |
| PNPLA2    | -0,94727156  | 2,08495E-05 | 0,005852942 |
| CDCA4     | -1,164262677 | 2,09123E-05 | 0,005852942 |

## DEGs shTFEB vs scr-shRNA ECs

|           |              |             |             |
|-----------|--------------|-------------|-------------|
| NFYC      | -0,813214193 | 2,12859E-05 | 0,005852942 |
| VIP       | 0,955743393  | 2,14998E-05 | 0,005852942 |
| EIF1      | -0,849085663 | 2,16226E-05 | 0,005852942 |
| NCKIPSD   | -0,944030878 | 2,20336E-05 | 0,005852942 |
| C22ORF13  | -0,912378449 | 2,20993E-05 | 0,005852942 |
| HMG2      | -1,13688005  | 2,30385E-05 | 0,005909145 |
| EFNA1     | 1,141635859  | 2,30678E-05 | 0,005909145 |
| CHAF1A    | -0,945927579 | 2,39162E-05 | 0,006027656 |
| DTL       | -1,0689881   | 2,49134E-05 | 0,006151622 |
| NDUFV1    | -0,914701986 | 2,51954E-05 | 0,006151622 |
| RPL28     | -1,196885225 | 2,58268E-05 | 0,006162487 |
| ALDH1A2   | -1,418065819 | 2,64668E-05 | 0,006162487 |
| AQP11     | 0,901604997  | 2,66898E-05 | 0,006162487 |
| CCDC106   | -0,936042892 | 2,68174E-05 | 0,006162487 |
| MAP4K2    | -0,991633393 | 2,9882E-05  | 0,006767191 |
| ATG9A     | -1,10103488  | 3,16352E-05 | 0,007021814 |
| TRMT5     | -1,187843246 | 3,19051E-05 | 0,007021814 |
| CRKL      | -0,814597117 | 3,29741E-05 | 0,007156304 |
| MCM10     | -1,048034148 | 3,36612E-05 | 0,00715909  |
| FOX1      | -1,624621026 | 3,40676E-05 | 0,00715909  |
| CDC25B    | -1,43870005  | 3,47582E-05 | 0,00715909  |
| DCAF7     | -0,791732291 | 3,55549E-05 | 0,00715909  |
| HS.531457 | -0,948127552 | 3,56949E-05 | 0,00715909  |
| SF3A1     | -0,899349565 | 3,57359E-05 | 0,00715909  |
| FAM189B   | -1,006805512 | 3,67331E-05 | 0,007181444 |
| C19ORF56  | -1,138452606 | 3,67666E-05 | 0,007181444 |
| SCARB1    | -0,951729627 | 3,84718E-05 | 0,007357934 |
| MRPL4     | -0,910678794 | 3,90271E-05 | 0,007357934 |
| DDIT4     | 1,164906477  | 3,90828E-05 | 0,007357934 |
| DPH2      | -0,797545052 | 4,01061E-05 | 0,007460688 |
| CKS1B     | -1,183338624 | 4,11297E-05 | 0,007561093 |
| CABLES2   | -1,04765184  | 4,22455E-05 | 0,007675908 |
| PDXP      | -0,782004966 | 4,70595E-05 | 0,00845232  |
| PMP22     | -0,911630789 | 4,98439E-05 | 0,008771219 |
| MCM3      | -1,109383359 | 4,99577E-05 | 0,008771219 |
| TP53INP1  | 1,19356065   | 5,42498E-05 | 0,009418967 |
| LCOR      | 0,770870502  | 5,66489E-05 | 0,009727429 |
| SNORA61   | -1,074424416 | 6,21235E-05 | 0,010551537 |
| YPEL5     | 0,929222233  | 6,36344E-05 | 0,010691945 |
| C16ORF35  | -0,908978561 | 6,68859E-05 | 0,011047487 |
| TRABD     | -0,826185464 | 6,71644E-05 | 0,011047487 |
| NBL1      | -1,114837899 | 6,79181E-05 | 0,011055087 |
| TAF4      | -0,869087058 | 6,98507E-05 | 0,011252441 |
| PRMT2     | -0,770355609 | 7,45548E-05 | 0,011724329 |
| SORBS3    | -0,87255715  | 7,47653E-05 | 0,011724329 |
| FNBP1L    | 0,835082276  | 7,50309E-05 | 0,011724329 |
| SHISA5    | -0,73945235  | 7,60455E-05 | 0,011765218 |
| C8ORF55   | -0,877995206 | 7,83106E-05 | 0,011996871 |
| NUAK1     | 0,869221521  | 8,06753E-05 | 0,012239145 |
| SNORA24   | -1,042036396 | 8,16722E-05 | 0,012271244 |
| NECAP2    | 0,817437227  | 8,57232E-05 | 0,012654884 |
| PAQR4     | -1,035256163 | 8,58452E-05 | 0,012654884 |
| POLM      | -0,87467634  | 8,95771E-05 | 0,012977878 |
| ETV4      | -1,137847047 | 8,96974E-05 | 0,012977878 |
| TOMM34    | -0,82762865  | 9,09274E-05 | 0,013035152 |

## DEGs shTFEB vs scr-shRNA ECs

|          |              |             |             |
|----------|--------------|-------------|-------------|
| CDT1     | -1,183425387 | 9,51937E-05 | 0,013418629 |
| IL1A     | 0,968163888  | 9,53198E-05 | 0,013418629 |
| NAT15    | -0,869349459 | 9,73317E-05 | 0,013579509 |
| CAMK2N1  | -1,047499045 | 9,91743E-05 | 0,013600312 |
| ZDHHC8   | -0,700895549 | 9,92215E-05 | 0,013600312 |
| C17ORF53 | -1,024053807 | 0,000103552 | 0,014070489 |
| IMPDH1   | -0,72569461  | 0,000109437 | 0,014741945 |
| NSUN4    | -0,748967007 | 0,000111871 | 0,014940949 |
| CRIP2    | -0,67836923  | 0,000114246 | 0,0151289   |
| SLC35A4  | -0,820678074 | 0,000117008 | 0,015364468 |
| CLDND1   | -0,75987455  | 0,000121556 | 0,015828596 |
| E2F4     | -0,74085311  | 0,000132537 | 0,017013333 |
| SEMA4D   | -0,829990326 | 0,000132832 | 0,017013333 |
| C2ORF34  | -0,680801634 | 0,00013415  | 0,017042551 |
| MAML1    | -0,765076679 | 0,000135707 | 0,017101322 |
| TCF3     | -0,984123207 | 0,000140521 | 0,01743263  |
| JOSD1    | -0,79588689  | 0,000140568 | 0,01743263  |
| HOXA9    | 0,82703235   | 0,000143308 | 0,017632508 |
| ZNF323   | 0,888189599  | 0,000146483 | 0,017882365 |
| BCL9L    | -0,668732616 | 0,000151403 | 0,01833975  |
| C15ORF52 | 0,902958545  | 0,000152718 | 0,018356705 |
| UBE2L3   | -0,889476863 | 0,000157714 | 0,018521701 |
| PGM2L1   | 1,283633547  | 0,000157765 | 0,018521701 |
| FKBP5    | -0,703566758 | 0,000159114 | 0,018521701 |
| THAP10   | -1,045048606 | 0,000161149 | 0,018521701 |
| BCL7C    | -0,964819797 | 0,000163835 | 0,018521701 |
| AMPH     | -1,081372295 | 0,000163962 | 0,018521701 |
| ATP1B3   | -0,711173901 | 0,000164021 | 0,018521701 |
| GOLPH4   | -0,83544388  | 0,000164681 | 0,018521701 |
| RARA     | -0,793619866 | 0,00016497  | 0,018521701 |
| RIC8A    | -0,79015518  | 0,000165944 | 0,018521701 |
| MMS19    | -0,799418379 | 0,000177054 | 0,019621598 |
| SLC39A14 | -0,809326305 | 0,000180271 | 0,01983743  |
| FURIN    | -0,934750255 | 0,000189833 | 0,02074359  |
| UHRF1    | -1,251405683 | 0,000197252 | 0,021299082 |
| STARD7   | -0,676233055 | 0,000198311 | 0,021299082 |
| RRS1     | -0,680247713 | 0,000199006 | 0,021299082 |
| GGA3     | -0,784333634 | 0,000202623 | 0,021469636 |
| ANGPTL4  | 0,675234502  | 0,000205221 | 0,021469636 |
| PITPNM1  | -0,953760006 | 0,000205587 | 0,021469636 |
| EVI5L    | -0,955332189 | 0,000206416 | 0,021469636 |
| PIP5K1C  | -0,84560007  | 0,000207469 | 0,021469636 |
| N-PAC    | -0,855251594 | 0,000211971 | 0,021791177 |
| IQGAP1   | -0,747262143 | 0,000224974 | 0,022976713 |
| ARSD     | 0,938904433  | 0,000227048 | 0,023037977 |
| FBXO32   | 1,002322379  | 0,000233124 | 0,023386411 |
| CGNL1    | -0,689521196 | 0,000235533 | 0,023386411 |
| B3GALT6  | -1,050678158 | 0,000235905 | 0,023386411 |
| FANCE    | -0,703920945 | 0,000236468 | 0,023386411 |
| MIER2    | -0,943332617 | 0,000241397 | 0,023614395 |
| TMUB1    | -0,731564914 | 0,000241796 | 0,023614395 |
| FOSL1    | -0,925512821 | 0,000243752 | 0,023657547 |
| MBD6     | -0,766739091 | 0,000250754 | 0,02418688  |
| C16ORF62 | -0,68563587  | 0,000259342 | 0,024861853 |
| UBE3B    | -0,877541711 | 0,000261021 | 0,024870162 |

## DEGs shTFEB vs scr-shRNA ECs

|           |              |             |             |
|-----------|--------------|-------------|-------------|
| C8ORF4    | 1,233622599  | 0,000264237 | 0,025024    |
| ATP2B4    | -0,754716425 | 0,000266143 | 0,025052695 |
| TBC1D24   | -0,796386688 | 0,000274942 | 0,025590941 |
| E2F2      | -1,529487625 | 0,000276671 | 0,025590941 |
| HS.12876  | 0,62202864   | 0,000278483 | 0,025590941 |
| ATAD2     | -0,772582644 | 0,000279662 | 0,025590941 |
| DENND4B   | -0,929900808 | 0,000280465 | 0,025590941 |
| MCM2      | -1,107721701 | 0,000283072 | 0,025590941 |
| PABPN1    | -0,764026637 | 0,000283736 | 0,025590941 |
| STARD10   | 0,815160178  | 0,000284962 | 0,025590941 |
| TROAP     | -0,895352426 | 0,000290017 | 0,025895995 |
| C20ORF117 | -0,856538866 | 0,000293277 | 0,026038301 |
| CDC42EP4  | -0,637752489 | 0,000296411 | 0,026167871 |
| CBFB      | -0,735476492 | 0,000299438 | 0,026286626 |
| CHMP7     | -0,684665515 | 0,0003111   | 0,027077213 |
| CLIP3     | 0,820975026  | 0,00031191  | 0,027077213 |
| PLSCR4    | 1,073065886  | 0,000321    | 0,02771245  |
| CCDC24    | 0,694605482  | 0,000332913 | 0,028527785 |
| ITPR1     | 0,710729766  | 0,000335016 | 0,028527785 |
| FAM65A    | -0,639798005 | 0,000335922 | 0,028527785 |
| DHX34     | -0,624511601 | 0,00034     | 0,02857247  |
| STEAP3    | -0,931998761 | 0,000340105 | 0,02857247  |
| FKBP9L    | -0,914016636 | 0,000344886 | 0,02879173  |
| CKAP5     | -0,715885951 | 0,0003464   | 0,02879173  |
| MGAT1     | -0,824527113 | 0,000355974 | 0,029298374 |
| HBP1      | 0,693615635  | 0,000356245 | 0,029298374 |
| SLC25A39  | -0,641872702 | 0,000360684 | 0,029447856 |
| KPNA5     | 0,616296202  | 0,000363157 | 0,029447856 |
| ADCY3     | -0,819444123 | 0,000366521 | 0,029447856 |
| PTGS2     | 0,653987691  | 0,000366522 | 0,029447856 |
| ARHGAP23  | -0,938474172 | 0,000367486 | 0,029447856 |
| TRAF7     | -0,760695051 | 0,000369437 | 0,029453202 |
| SENP5     | -0,625538502 | 0,000374767 | 0,029535321 |
| MMS19L    | -0,656348277 | 0,000375212 | 0,029535321 |
| ANKRD46   | 0,814371375  | 0,000376174 | 0,029535321 |
| MCM6      | -0,83658405  | 0,000378028 | 0,029535321 |
| RPAP1     | -0,865939413 | 0,000383564 | 0,029818797 |
| ZNF672    | -0,728983318 | 0,000389911 | 0,030162113 |
| SNHG1     | -0,809035356 | 0,000393304 | 0,030201293 |
| ECE2      | -0,65352121  | 0,000394283 | 0,030201293 |
| HS.154948 | -0,64177816  | 0,00040076  | 0,030547693 |
| GMNN      | -0,754760547 | 0,00040309  | 0,0305761   |
| USP1      | -0,726981001 | 0,000406222 | 0,03066482  |
| SLC40A1   | 0,803848478  | 0,000424054 | 0,031758236 |
| KLHDC8B   | 0,761608329  | 0,000424771 | 0,031758236 |
| RFC3      | -0,82318453  | 0,00042952  | 0,031960365 |
| BTBD2     | -0,701349347 | 0,000438877 | 0,032501893 |
| RPUSD3    | -0,605781455 | 0,000444223 | 0,032742614 |
| CCNA2     | -0,780543298 | 0,000481009 | 0,035287528 |
| LMNB2     | -0,893208573 | 0,000486753 | 0,035355919 |
| C16ORF59  | -0,939073131 | 0,00048678  | 0,035355919 |
| RAD51AP1  | -0,633939371 | 0,000488729 | 0,035355919 |
| TYRO3     | -0,769766678 | 0,000493132 | 0,035510021 |
| BLM       | -0,775214512 | 0,000503305 | 0,036076358 |
| ARHGDI1A  | -0,662037311 | 0,000520057 | 0,037106914 |

## DEGs shTFEB vs scr-shRNA ECs

|           |              |             |             |
|-----------|--------------|-------------|-------------|
| CDCA1     | -0,700941462 | 0,00052414  | 0,037204848 |
| MED22     | -0,621066118 | 0,000526192 | 0,037204848 |
| ERBB2     | -0,753999774 | 0,000535353 | 0,037682124 |
| CASP3     | 0,684048349  | 0,000548415 | 0,0384284   |
| C7ORF49   | -0,592978946 | 0,000555526 | 0,038752879 |
| GABARAPL1 | 0,96587899   | 0,000562632 | 0,038979478 |
| CYB561    | -0,562828928 | 0,000565701 | 0,038979478 |
| SLC35D2   | 0,645896975  | 0,000566258 | 0,038979478 |
| HS.355933 | -0,943410705 | 0,000572571 | 0,039081415 |
| MSH6      | -0,776341042 | 0,00057762  | 0,039081415 |
| POLE2     | -0,787709216 | 0,000583947 | 0,039081415 |
| ULK1      | -0,696346778 | 0,00058492  | 0,039081415 |
| HOXD1     | 0,750602201  | 0,000587704 | 0,039081415 |
| C14ORF124 | -0,976155483 | 0,000591466 | 0,039081415 |
| LACTB     | 0,808518754  | 0,000598794 | 0,039081415 |
| GATA2     | -0,557246422 | 0,000598926 | 0,039081415 |
| ARL2      | -0,641525518 | 0,000599315 | 0,039081415 |
| HHEX      | 0,599360458  | 0,000600123 | 0,039081415 |
| PFAS      | -0,73538971  | 0,000600312 | 0,039081415 |
| PRC1      | -0,686294152 | 0,000602452 | 0,039081415 |
| CLCN7     | -0,612677939 | 0,000608427 | 0,039081415 |
| RNF4      | -0,564717448 | 0,000610052 | 0,039081415 |
| STC1      | -0,653940172 | 0,00061706  | 0,039081415 |
| C9ORF140  | -0,889000893 | 0,000618042 | 0,039081415 |
| AP1B1     | -0,886856406 | 0,000618324 | 0,039081415 |
| BSDC1     | 0,624105685  | 0,000619661 | 0,039081415 |
| SNORD99   | -0,650369835 | 0,000621644 | 0,039081415 |
| CTSB      | -0,585711249 | 0,000622138 | 0,039081415 |
| PLXNA1    | -0,610262614 | 0,000622342 | 0,039081415 |
| SLC10A3   | -0,852604469 | 0,000625021 | 0,039081415 |
| OAZ2      | 0,90427808   | 0,000625263 | 0,039081415 |
| RRM2      | -1,026962242 | 0,000632305 | 0,039364125 |
| PPP3CB    | 0,568563238  | 0,000637251 | 0,039485458 |
| OTUB1     | -0,651396911 | 0,000639308 | 0,039485458 |
| RMI1      | -0,643515049 | 0,000650417 | 0,039717231 |
| SEPT9     | -0,727506539 | 0,00065081  | 0,039717231 |
| SLC25A10  | -0,66043994  | 0,000652454 | 0,039717231 |
| SLC45A1   | 0,623747392  | 0,000653227 | 0,039717231 |
| POMT2     | -0,572662066 | 0,000660506 | 0,040004133 |
| TNFAIP1   | -0,649595802 | 0,000663347 | 0,040021063 |
| EPOR      | -0,587156742 | 0,000666478 | 0,040055301 |
| C5ORF53   | 0,601465382  | 0,000681113 | 0,040706414 |
| GBAS      | -0,594006615 | 0,000682952 | 0,040706414 |
| SLC24A6   | -0,672552824 | 0,000685127 | 0,040706414 |
| RWDD2B    | -0,579144355 | 0,000690771 | 0,040853873 |
| FAM53C    | -0,61204753  | 0,000693245 | 0,040853873 |
| MCM4      | -1,026338252 | 0,000696398 | 0,040853873 |
| CDC45L    | -1,02548563  | 0,000700464 | 0,040853873 |
| ATF3      | 0,838360806  | 0,000702312 | 0,040853873 |
| TNFSF12   | -0,760234854 | 0,000705857 | 0,040853873 |
| ZSCAN2    | 0,604382445  | 0,00070591  | 0,040853873 |
| C19ORF48  | -0,75627673  | 0,000715288 | 0,04124387  |
| FEN1      | -0,85132479  | 0,000719661 | 0,041343479 |
| PPP1R12A  | 0,542438546  | 0,00073003  | 0,041785532 |
| TRIM25    | 0,648460113  | 0,000734664 | 0,041897303 |



## DEGs shTFEB vs scr-shRNA ECs

|           |              |             |             |
|-----------|--------------|-------------|-------------|
| KRT18P13  | 0,574446969  | 0,000740973 | 0,042103408 |
| MYO9B     | -0,664768666 | 0,000751189 | 0,042529252 |
| DENND1A   | 0,642329466  | 0,000759174 | 0,042826196 |
| NFKBIA    | 0,809271061  | 0,000770599 | 0,043253576 |
| NR2C2AP   | -0,680765305 | 0,000772286 | 0,043253576 |
| HS.513971 | -0,661813275 | 0,000779658 | 0,043459195 |
| VRK3      | 0,615248144  | 0,00078152  | 0,043459195 |
| MAPRE3    | 0,559176034  | 0,000787621 | 0,043643168 |
| OPN3      | -0,650949256 | 0,000795692 | 0,04366015  |
| PLK2      | 0,708205011  | 0,000795925 | 0,04366015  |
| DDB1      | -0,590045569 | 0,00079911  | 0,04366015  |
| C11ORF75  | -0,790475881 | 0,000802037 | 0,04366015  |
| TGIF1     | 0,743077741  | 0,000805051 | 0,04366015  |
| GINS2     | -0,890979811 | 0,000807378 | 0,04366015  |
| TYMS      | -0,628165459 | 0,000807486 | 0,04366015  |
| LYRM5     | -0,582657381 | 0,000811411 | 0,043721077 |
| TRIP13    | -0,720551328 | 0,000822551 | 0,044169029 |
| POLR2D    | -0,689340758 | 0,000834364 | 0,044649895 |
| HS.143408 | -0,657213082 | 0,000838287 | 0,044706757 |
| MYLIP     | 0,625236226  | 0,000874317 | 0,046469677 |
| SDHAF2    | -0,599202946 | 0,000879062 | 0,046537177 |
| CD320     | -0,567518072 | 0,000881544 | 0,046537177 |
| NCLN      | -0,594933433 | 0,000887042 | 0,046669761 |
| FAM149B1  | 0,627467513  | 0,000895985 | 0,046919253 |
| MARCH2    | 0,554602985  | 0,000897789 | 0,046919253 |
| FAM124B   | 0,871646741  | 0,000910764 | 0,047438678 |
| C1ORF135  | -0,776815702 | 0,000914214 | 0,047460134 |
| NEDD4     | 0,635532899  | 0,000919313 | 0,047566818 |
| ENG       | -0,734350999 | 0,000926558 | 0,047783501 |
| DDX31     | -0,595882634 | 0,000972934 | 0,049943622 |
| PLCG2     | 0,569831261  | 0,000974837 | 0,049943622 |
| ZNF702P   | 0,705863176  | 0,000989942 | 0,05055173  |
| ATN1      | -0,567702717 | 0,001019179 | 0,051875209 |
| SNX4      | 0,636388254  | 0,001024319 | 0,051967547 |
| RAB11FIP2 | 0,629332564  | 0,001030294 | 0,052101544 |
| KIF24     | -0,777040293 | 0,001039973 | 0,052157369 |
| ARSJ      | -0,53326363  | 0,00104128  | 0,052157369 |
| CARD10    | -0,632077181 | 0,001041412 | 0,052157369 |
| TMEM173   | 0,608618645  | 0,001059423 | 0,052889899 |
| TUBA3D    | -0,529597066 | 0,001065612 | 0,053029452 |
| SAMD14    | 0,533558793  | 0,001069924 | 0,053075046 |
| TSPAN18   | -0,704535283 | 0,001076252 | 0,053219962 |
| FBXL18    | -0,596184634 | 0,00108685  | 0,053574484 |
| SCRIB     | -0,5818955   | 0,001094871 | 0,053800177 |
| HIP1      | -0,587075682 | 0,001102329 | 0,053954753 |
| CCNA1     | -0,726748207 | 0,001104923 | 0,053954753 |
| DEK       | -0,546375742 | 0,001133544 | 0,055030774 |
| LRP8      | -0,574416219 | 0,001134002 | 0,055030774 |
| HS.374278 | 0,609211577  | 0,001140805 | 0,055189514 |
| HSDL1     | 0,784674188  | 0,00115006  | 0,05540536  |
| DNMT1     | -0,739635935 | 0,001152358 | 0,05540536  |
| PCNA      | -0,585464858 | 0,00116412  | 0,055799206 |
| SHOC2     | 0,543816546  | 0,001168099 | 0,05581872  |
| C9ORF100  | -0,576954869 | 0,001181089 | 0,056267361 |
| ANKRD52   | -0,75980976  | 0,001194041 | 0,0567115   |

## DEGs shTFEB vs scr-shRNA ECs

|               |              |             |             |
|---------------|--------------|-------------|-------------|
| ZWILCH        | -0,608436764 | 0,0012037   | 0,056997018 |
| ECSCR         | -0,524080557 | 0,001211598 | 0,057197686 |
| KCNK6         | -0,693827336 | 0,001217189 | 0,057288553 |
| RAVER1        | -0,714099126 | 0,001233919 | 0,057825707 |
| FRAT2         | 0,571590088  | 0,001236003 | 0,057825707 |
| ITGB3BP       | -0,564114578 | 0,001243193 | 0,057905796 |
| TESK1         | -0,532435973 | 0,001246505 | 0,057905796 |
| SESN1         | 0,820759625  | 0,001249913 | 0,057905796 |
| FLJ40504      | 0,547577647  | 0,001252538 | 0,057905796 |
| RRP12         | -0,63590328  | 0,001262763 | 0,058036525 |
| TXNDC9        | 0,639929104  | 0,001262794 | 0,058036525 |
| ELMOD1        | -0,750877878 | 0,001282172 | 0,058754316 |
| PRRG1         | 0,660657214  | 0,001288698 | 0,058814398 |
| EYA3          | -0,542202365 | 0,001291011 | 0,058814398 |
| CENPM         | -0,991589226 | 0,001302324 | 0,059157306 |
| KLHL24        | 0,820444946  | 0,001313781 | 0,0594146   |
| RIPK2         | 0,600182522  | 0,001315593 | 0,0594146   |
| DKFZP761P0423 | -0,666129196 | 0,001320073 | 0,059445113 |
| FNDC3A        | 0,628230969  | 0,001331678 | 0,059795413 |
| CENPA         | -0,788489523 | 0,001342447 | 0,060106237 |
| ASF1B         | -0,826764072 | 0,001363925 | 0,06089339  |
| MCM5          | -0,71425852  | 0,001374453 | 0,061188601 |
| DHX37         | -0,613303344 | 0,001386304 | 0,061540851 |
| SNHG8         | -0,898435875 | 0,001392399 | 0,061636336 |
| PLK1          | -0,669370782 | 0,001406249 | 0,062073569 |
| CCNE2         | -0,599297968 | 0,001417678 | 0,06240181  |
| DUT           | -0,766667572 | 0,0014243   | 0,062517161 |
| RNF38         | 0,637137718  | 0,001443031 | 0,063161925 |
| CHAF1B        | -0,957004253 | 0,001466102 | 0,063861634 |
| AURKB         | -0,754641123 | 0,001467191 | 0,063861634 |
| CPEB3         | 0,638879382  | 0,001478632 | 0,064019665 |
| SMARCD1       | -0,542408503 | 0,001483895 | 0,064019665 |
| NLF2          | 0,576887605  | 0,001484544 | 0,064019665 |
| DHCR24        | -0,601780793 | 0,00148721  | 0,064019665 |
| ZNF697        | 0,555114305  | 0,00150412  | 0,064569704 |
| GPR124        | -0,710560142 | 0,001521239 | 0,065048426 |
| TNS1          | -0,568562299 | 0,001523597 | 0,065048426 |
| GPR126        | 0,67670744   | 0,001547902 | 0,065789625 |
| ATP6V0D1      | -0,560664427 | 0,001549378 | 0,065789625 |
| CENPJ         | -0,650034482 | 0,001558272 | 0,065987955 |
| ATP8B2        | -0,638352784 | 0,001595581 | 0,06738526  |
| JUND          | -0,539468511 | 0,001611553 | 0,067693875 |
| NDST1         | -0,630732579 | 0,001620035 | 0,067867748 |
| IL4I1         | 0,56338196   | 0,001663614 | 0,069507041 |
| HEY2          | -0,67529505  | 0,001691851 | 0,070498288 |
| ZNF627        | 0,600112677  | 0,001703765 | 0,070805927 |
| FBXO5         | -0,635975974 | 0,001713242 | 0,070953087 |
| FBXL6         | -0,519437019 | 0,001716387 | 0,070953087 |
| MRPL54        | -1,094491931 | 0,001726048 | 0,0711642   |
| C2CD4B        | 0,578294766  | 0,001735615 | 0,071311262 |
| INPPL1        | -0,554197896 | 0,001738743 | 0,071311262 |
| NFIC          | -0,654225224 | 0,001749321 | 0,071486194 |
| CDCA5         | -0,850675015 | 0,001752157 | 0,071486194 |
| RWDD3         | 0,625012642  | 0,001765094 | 0,071795955 |
| ABCA1         | 0,684971808  | 0,001770777 | 0,071795955 |

## DEGs shTFEB vs scr-shRNA ECs

|           |              |             |             |
|-----------|--------------|-------------|-------------|
| SNORD104  | -0,991282848 | 0,001775366 | 0,071795955 |
| TJAP1     | -0,633731692 | 0,001778128 | 0,071795955 |
| C16ORF75  | -0,997206071 | 0,001787025 | 0,071969188 |
| SH2B3     | -0,578337102 | 0,001812851 | 0,072821621 |
| TNRC6B    | 0,648843474  | 0,001823872 | 0,073076456 |
| PHF19     | -0,599097905 | 0,001837705 | 0,073442383 |
| RHOB      | 0,920793458  | 0,001845725 | 0,07357473  |
| PRMT6     | -0,526420261 | 0,001854645 | 0,073742188 |
| BBS2      | 0,649643657  | 0,001872224 | 0,074011869 |
| FCHO1     | -0,509865211 | 0,0018776   | 0,074011869 |
| SLC25A29  | 0,540454412  | 0,001889649 | 0,074011869 |
| SIDT2     | -0,587387229 | 0,001894225 | 0,074011869 |
| GGCX      | -0,512682261 | 0,001896429 | 0,074011869 |
| BRCA1     | -0,67563551  | 0,001896558 | 0,074011869 |
| NOL6      | -0,552213453 | 0,001909264 | 0,074011869 |
| LRP5      | -0,81598481  | 0,001911364 | 0,074011869 |
| KIDINS220 | 0,518493476  | 0,00191233  | 0,074011869 |
| FILIP1L   | 0,799333614  | 0,001923537 | 0,074011869 |
| BAZ2B     | 0,539308371  | 0,001932117 | 0,074011869 |
| EHD1      | -0,535188277 | 0,001933219 | 0,074011869 |
| DUSP5     | -0,695211537 | 0,001933361 | 0,074011869 |
| NME4      | -0,729480101 | 0,001935137 | 0,074011869 |
| LY6E      | -0,680926564 | 0,001937211 | 0,074011869 |
| SLFN11    | -0,629159065 | 0,001953042 | 0,074434706 |
| CCDC102A  | 0,52571578   | 0,001987219 | 0,075552992 |
| RRAGC     | 0,5654234    | 0,002020881 | 0,07664634  |
| SLC2A3    | 0,766809636  | 0,002047648 | 0,07732387  |
| SORBS2    | 0,901805437  | 0,002050592 | 0,07732387  |
| H2AFZ     | -0,615243037 | 0,002053591 | 0,07732387  |
| EED       | -0,533312146 | 0,002065292 | 0,077575755 |
| TDRD7     | 0,655226898  | 0,002070209 | 0,077575755 |
| KPNA4     | -0,518091824 | 0,002084536 | 0,077925736 |
| NFKBIE    | 0,583080055  | 0,002093485 | 0,077969403 |
| OGDH      | -0,615432461 | 0,002102269 | 0,077969403 |
| NCOR2     | -0,749129693 | 0,002102589 | 0,077969403 |
| DCUN1D3   | 0,505723974  | 0,002112354 | 0,078020765 |
| POLA1     | -0,648179027 | 0,002117036 | 0,078020765 |
| EXOSC2    | -0,598130043 | 0,002171197 | 0,079641143 |
| HS1BP3    | 0,671267961  | 0,002194572 | 0,080310041 |
| RAG1AP1   | 0,537395715  | 0,002207748 | 0,080439802 |
| DDX11     | -0,569903014 | 0,002210485 | 0,080439802 |
| TMEM201   | -0,81059031  | 0,002221106 | 0,080439802 |
| KLHL36    | 0,530067597  | 0,002223857 | 0,080439802 |
| RAD54L2   | -0,504206773 | 0,002256684 | 0,081086037 |
| NRM       | -0,5759694   | 0,002257291 | 0,081086037 |
| CENPN     | -0,623072349 | 0,002275242 | 0,081543419 |
| TMEM187   | 0,591786285  | 0,002289472 | 0,081824208 |
| AXUD1     | -0,534144093 | 0,002310613 | 0,082115485 |
| FIGNL1    | -0,561483268 | 0,002317479 | 0,082115485 |
| RAB5B     | 0,54734411   | 0,002332877 | 0,082317865 |
| MLL4      | -0,558196079 | 0,002340917 | 0,082317865 |
| H2AFX     | -0,826710628 | 0,002349073 | 0,082317865 |
| ANKRD9    | -0,525732032 | 0,002357331 | 0,082317865 |
| SLC2A4RG  | -0,506168503 | 0,002360412 | 0,082317865 |
| FAM117B   | 0,593156217  | 0,002362209 | 0,082317865 |

## DEGs shTFEB vs scr-shRNA ECs

|           |              |             |             |
|-----------|--------------|-------------|-------------|
| RHOD      | 0,59803265   | 0,00236353  | 0,082317865 |
| ARMCX1    | 0,665529213  | 0,002365335 | 0,082317865 |
| C15ORF39  | -0,642745284 | 0,00237779  | 0,082567432 |
| NPR1      | -0,696132612 | 0,002398054 | 0,083086464 |
| HNRNPL    | -0,732508586 | 0,002483109 | 0,085679037 |
| TBC1D9    | 0,637126719  | 0,002501104 | 0,086084251 |
| RALGAPB   | 0,52217734   | 0,002518744 | 0,086324321 |
| C5ORF41   | 0,544638086  | 0,002521034 | 0,086324321 |
| BTBD11    | -0,628436579 | 0,002524652 | 0,086324321 |
| UBFD1     | 0,506156551  | 0,002540974 | 0,08669271  |
| SCAP      | -0,512743709 | 0,002569367 | 0,08747044  |
| BEXL1     | 0,546664174  | 0,002598089 | 0,088255943 |
| RNF144A   | -0,617031449 | 0,002607845 | 0,088395197 |
| ANKRD57   | -0,53378899  | 0,002628005 | 0,088885717 |
| CSNK1D    | 0,542070431  | 0,002636184 | 0,08896978  |
| IFRD2     | -0,53701988  | 0,002656866 | 0,089474542 |
| MTHFD1    | -0,510814368 | 0,002664181 | 0,089527946 |
| SUPT6H    | -0,510211418 | 0,002671654 | 0,089586409 |
| KCNMB1    | -0,644236411 | 0,002677917 | 0,089604152 |
| SNN       | 0,506508366  | 0,00269058  | 0,089737785 |
| HS.126108 | -0,503559676 | 0,002693397 | 0,089737785 |
| SLC37A4   | -0,578631683 | 0,002703914 | 0,089745815 |
| FANCB     | -0,537456891 | 0,002718965 | 0,090013869 |
| HJURP     | -0,620285712 | 0,002765072 | 0,090730655 |
| CHMP5     | 0,508860573  | 0,002774851 | 0,090730655 |
| PPM1D     | 0,552197715  | 0,002775261 | 0,090730655 |
| PDXK      | -0,559238997 | 0,002775455 | 0,090730655 |
| C14ORF179 | 0,515920064  | 0,002802289 | 0,091140872 |
| XPO6      | -0,60784541  | 0,00280695  | 0,091140872 |
| DNAJC9    | -0,611801636 | 0,002812802 | 0,091140872 |
| SLC7A2    | 0,702840044  | 0,002817535 | 0,091140872 |
| PTGR1     | 0,585370738  | 0,002821363 | 0,091140872 |
| ZNF217    | 0,570902239  | 0,002822999 | 0,091140872 |
| RNF41     | -0,536968538 | 0,002846395 | 0,091518049 |
| GAS2L3    | -0,547541373 | 0,002893431 | 0,092802035 |
| NNMT      | 0,625455512  | 0,002902454 | 0,092802035 |
| GINS4     | -0,585720753 | 0,002904147 | 0,092802035 |
| HIST2H2BE | 0,514699545  | 0,002911203 | 0,092837673 |
| C1QTNF6   | -0,5225129   | 0,002924146 | 0,093060506 |
| PPIC      | 0,54294821   | 0,002956582 | 0,093363538 |
| PGP       | -0,544060543 | 0,002960999 | 0,093363538 |
| BEX2      | 0,679599437  | 0,002967813 | 0,093363538 |
| OIP5      | -0,613538523 | 0,002969517 | 0,093363538 |
| MTMR4     | -0,540230745 | 0,002983728 | 0,093574138 |
| COPG      | -0,626065304 | 0,003020516 | 0,094397159 |
| RIPK5     | 0,607526743  | 0,003045934 | 0,095001538 |
| SERPINH1  | -0,777607398 | 0,003059672 | 0,095143032 |
| EXO1      | -0,751789007 | 0,003062648 | 0,095143032 |
| ZNF598    | -0,503503693 | 0,003125305 | 0,096484478 |
| CXORF38   | 0,599360305  | 0,003126567 | 0,096484478 |
| CC2D1A    | -0,505943597 | 0,003130159 | 0,096484478 |
| MAP1LC3B  | 0,565380941  | 0,003130528 | 0,096484478 |
| TTF2      | -0,510394489 | 0,003160749 | 0,09722414  |
| HMGCL     | 0,570359819  | 0,003189922 | 0,097928739 |
| DDAH1     | 0,500665959  | 0,003204342 | 0,098178535 |

DEGs shTFEB vs scr-shRNA ECs

|           |              |             |             |
|-----------|--------------|-------------|-------------|
| LYPLA2P1  | -0,536534109 | 0,003224278 | 0,098596013 |
| HS.258266 | -0,577238222 | 0,003243391 | 0,098986777 |
| RPL13A    | -0,508812214 | 0,003255697 | 0,099168653 |
| PGRMC2    | 0,576821942  | 0,003269842 | 0,09940573  |
| ESPL1     | -0,654244947 | 0,00329985  | 0,099552444 |
| UBE2T     | -0,754845713 | 0,003300723 | 0,099552444 |
| TNFRSF1B  | -0,555331893 | 0,00330634  | 0,099552444 |
| MAMLD1    | -0,60431816  | 0,003306522 | 0,099552444 |
