# Supplementary material for: TFEB controls vascular development by regulating the proliferation of endothelial cells
Source: PubMed Central journal article supplement — EMBO J. 2018 Dec 27;38(3):e98250. doi: 10.15252/embj.201798250 (PMC6356157; doi:10.15252/embj.201798250), 2018-12-27
Supplement: EMBJ-38-e98250-s002.pdf [file EMBJ-38-e98250-s002.pdf]

## Expanded View Figures

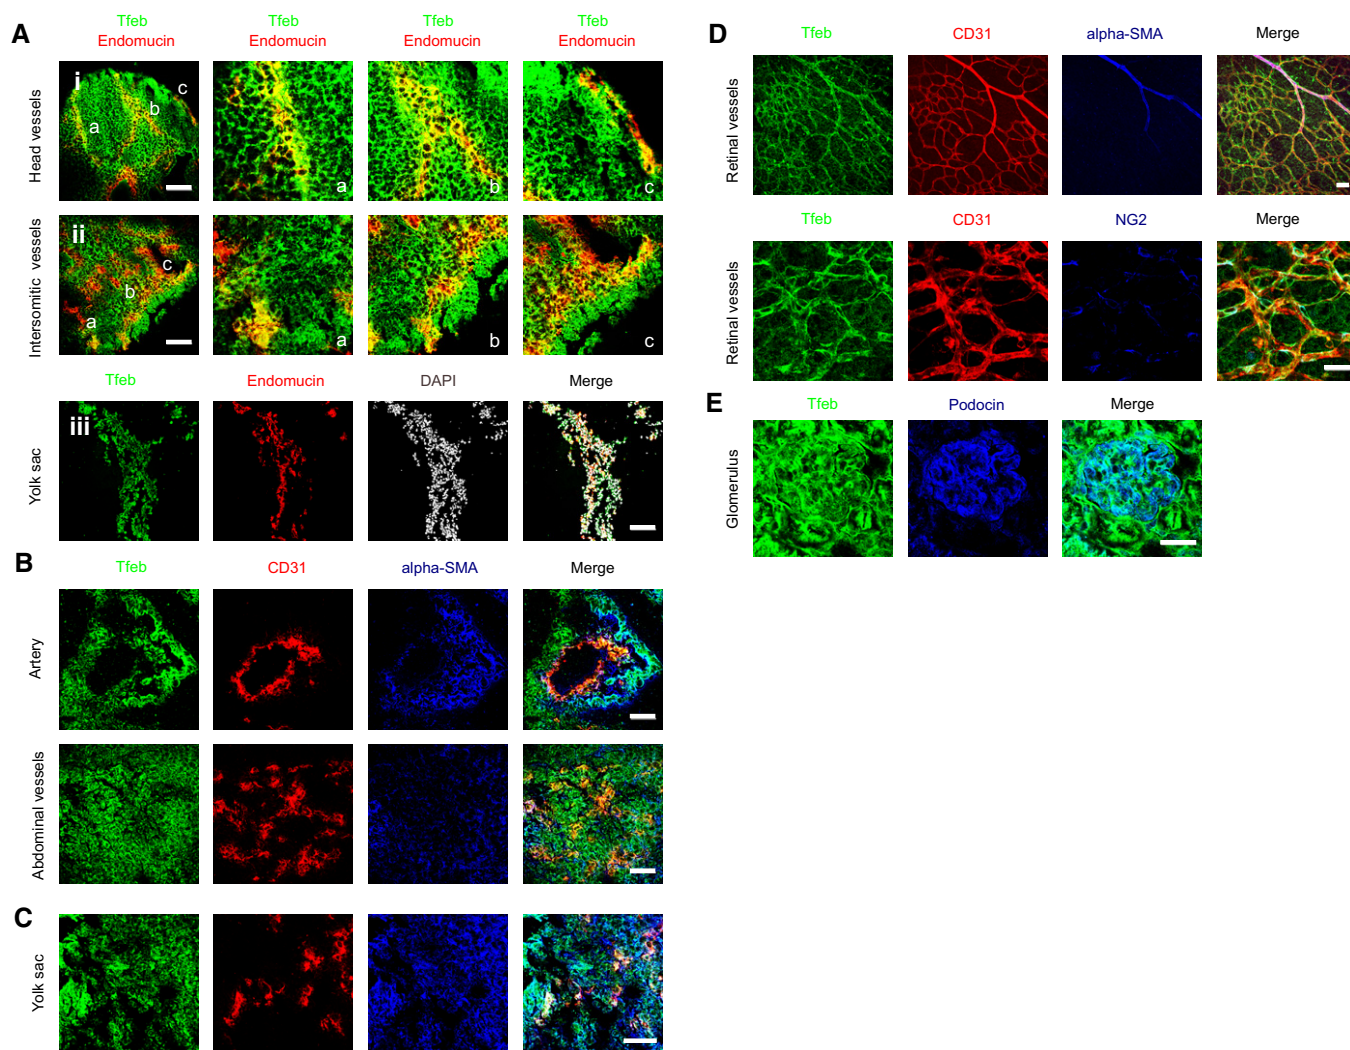

**Figure EV1. Different cells types express Tfeb in embryos, yolk sac, retina, and kidney.**

A *Tfeb* expression in embryos at E9.5 (embryos  $n = 6$ ). Representative images of head (details a, b, c), intrasomitic region (details a, b, c), and yolk sac of *Tfeb-EGFP* embryos stained with anti-GFP and anti-endomucin Abs (scale bars: 100  $\mu\text{m}$ ).

B–E *Tfeb* expression in ECs and smooth muscle cells in embryos, retina, and kidney. Representative images of *Tfeb-EGFP* embryos (E9.5) (B), yolk sac (E9.5) (C), retina (p5) (D), and renal glomerulus (E) (embryos and mice  $n = 6$ ) stained with anti-CD31, anti-alpha SMA, anti-NG2, anti-podocin, and anti-GFP Abs (scale bars: 100  $\mu\text{m}$ ).

**Figure EV2. *Tfeb* deletion in embryos and pups.**

- A EC *Tfeb* deletion does not induce alterations in the embryonic vasculature at E9.5 (embryos  $n = 6$ ). Representative images of whole-mount embryos (i) (scale bars: 0.5 mm). Vessels of the head (ii), ocular (iii), and intrasomitic regions (iv) were stained with anti-endomucin Ab (scale bars: 100  $\mu\text{m}$ ).
- B EC *Tfeb* deletion induces embryonic hypoxia at E10.5 (embryos  $n = 6$ ). Representative images of vessels and tissues of the head (i) and intrasomitic region (ii) of control and *Tfeb*<sup>EC-/-</sup> embryos stained with anti-endomucin (red) and the hypoxic marker pimonidazole (green; scale bars: 100  $\mu\text{m}$ ).
- C Expression of Tie2 and markers of the endothelial and hematopoietic lineages in *Tfeb*<sup>EC-/-</sup> yolk sacs at E9.5. Bar graphs indicate the percentage of yolk sac Tie2<sup>+</sup> cells or Flk<sup>+</sup> or CD31<sup>+</sup> or CD117<sup>+</sup>/CD41<sup>+</sup> and CD117<sup>+</sup>/CD71<sup>+</sup> within the Tie2<sup>+</sup> population ( $n = 3$ , mean  $\pm$  SEM; \* $P < 0.01$  versus control mice by Student's *t*-test).
- D Genotype of *Tfeb*<sup>IEC</sup> mice. Schematic representation of murine *Tfeb*, the targeted allele and the knockout allele (delta allele), and qPCR analysis of mRNA encoded by *Tfeb* exon 5–6 in lung ECs and epithelial cells isolated from control, *Tfeb*<sup>IEC-/+</sup>, and *Tfeb*<sup>IEC-/-</sup> mice. Data are expressed as relative fold-change compared with the expression in control mice after normalization to the housekeeping gene TBP (mice  $n = 3$ , mean  $\pm$  SEM; \* $P < 0.01$  and \*\* $P < 0.001$  versus control mice by Student's *t*-test).
- E Tfeb expression in renal tissue of control and *Tfeb*<sup>IEC-/-</sup> mice (p17). Representative images of renal glomerulus, artery, interstitial vessels, and the surrounding tissue of control and *Tfeb*<sup>IEC-/-</sup> mice (mice  $n = 6$ ). Tissues were stained with anti-CD31 and anti-GFP Abs (scale bars: 100  $\mu\text{m}$ ).

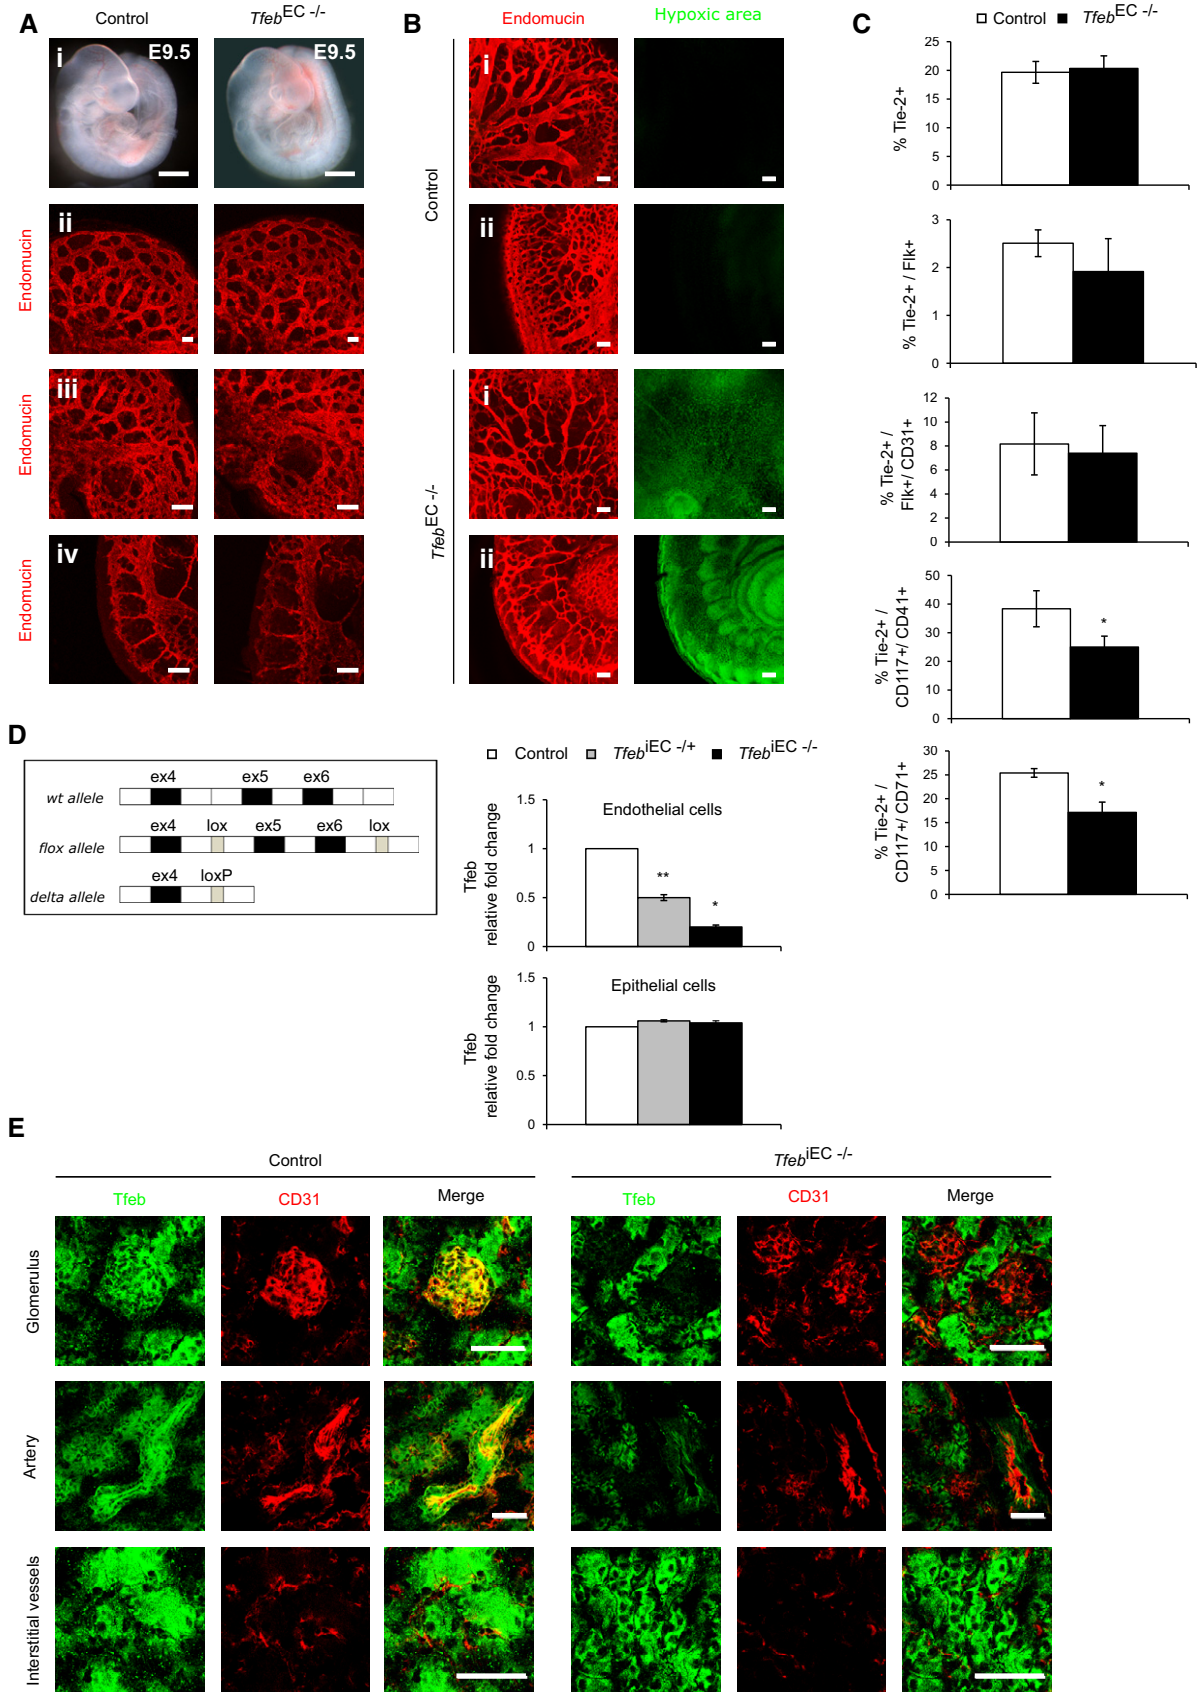

Figure EV2.

**Figure EV3. Post-natal maturation of retinal and renal vasculature after endothelium *Tfeb* silencing.**

- A EC *Tfeb* deletion compromises retinal vascular maturation at p10 and p15. Representative images of immunostaining of vascular front and vascular plexus of retina of control and *Tfeb*<sup>EC-/-</sup> mice (p10, p15) with an anti-iB4 Ab (scale bars: 50  $\mu\text{m}$ ).
- B–D EC *Tfeb* deletion compromises glomerular development and renal vascularization at p17. (B) Representative images of renal trichrome staining of control and *Tfeb*<sup>EC-/-</sup> mice at p17 (original magnification  $\times 10$ , scale bars: 25  $\mu\text{m}$ ). (C) Bar graph indicates the CD31<sup>+</sup> vascular area in control and *Tfeb*<sup>EC-/-</sup> mice (p17; mice  $n = 5$ , mean  $\pm$  SEM; \*\* $P < 0.001$  versus control mice by Student's t-test). (D) EC *Tfeb* deletion compromises renal vascularization at p27. Bar graph indicates the CD31<sup>+</sup> vascular area in control and *Tfeb*<sup>EC-/-</sup> mice (p27; mice  $n = 5$ , mean  $\pm$  SEM; \*\* $P < 0.001$  versus control mice by Student's t-test).
- E EC *Tfeb* deletion correlates with collagen deposition in kidney at p27. Representative images of immunostaining of kidney of control and *Tfeb*<sup>EC-/-</sup> mice (p27) with anti-collagen I, anti-collagen V, and anti-collagen IV antibodies (scale bars: 50  $\mu\text{m}$ ). Quantification area per field (mean  $\pm$  SEM): collagen I:  $26,107.2 \pm 3,200.82 \mu\text{m}^2$  in control mice versus  $43,069 \pm 9,754.7 \mu\text{m}^2$  in *Tfeb*<sup>EC-/-</sup> mice, mice  $n = 4$ ,  $P = 0.02$  versus control mice by Student's t-test; collagen V:  $33,500.4 \pm 4,201 \mu\text{m}^2$  in control mice versus  $47,007.9 \pm 6,287.7 \mu\text{m}^2$  in *Tfeb*<sup>EC-/-</sup> mice, mice  $n = 4$ ,  $P = 0.04$  versus control mice by Student's t-test; collagen IV:  $10,972.12 \pm 1,856.8 \mu\text{m}^2$  in control mice versus  $17,525.07 \pm 2,106.58 \mu\text{m}^2$  in *Tfeb*<sup>EC-/-</sup> mice, mice  $n = 4$ ,  $P = 0.03$  versus control mice by Student's t-test).



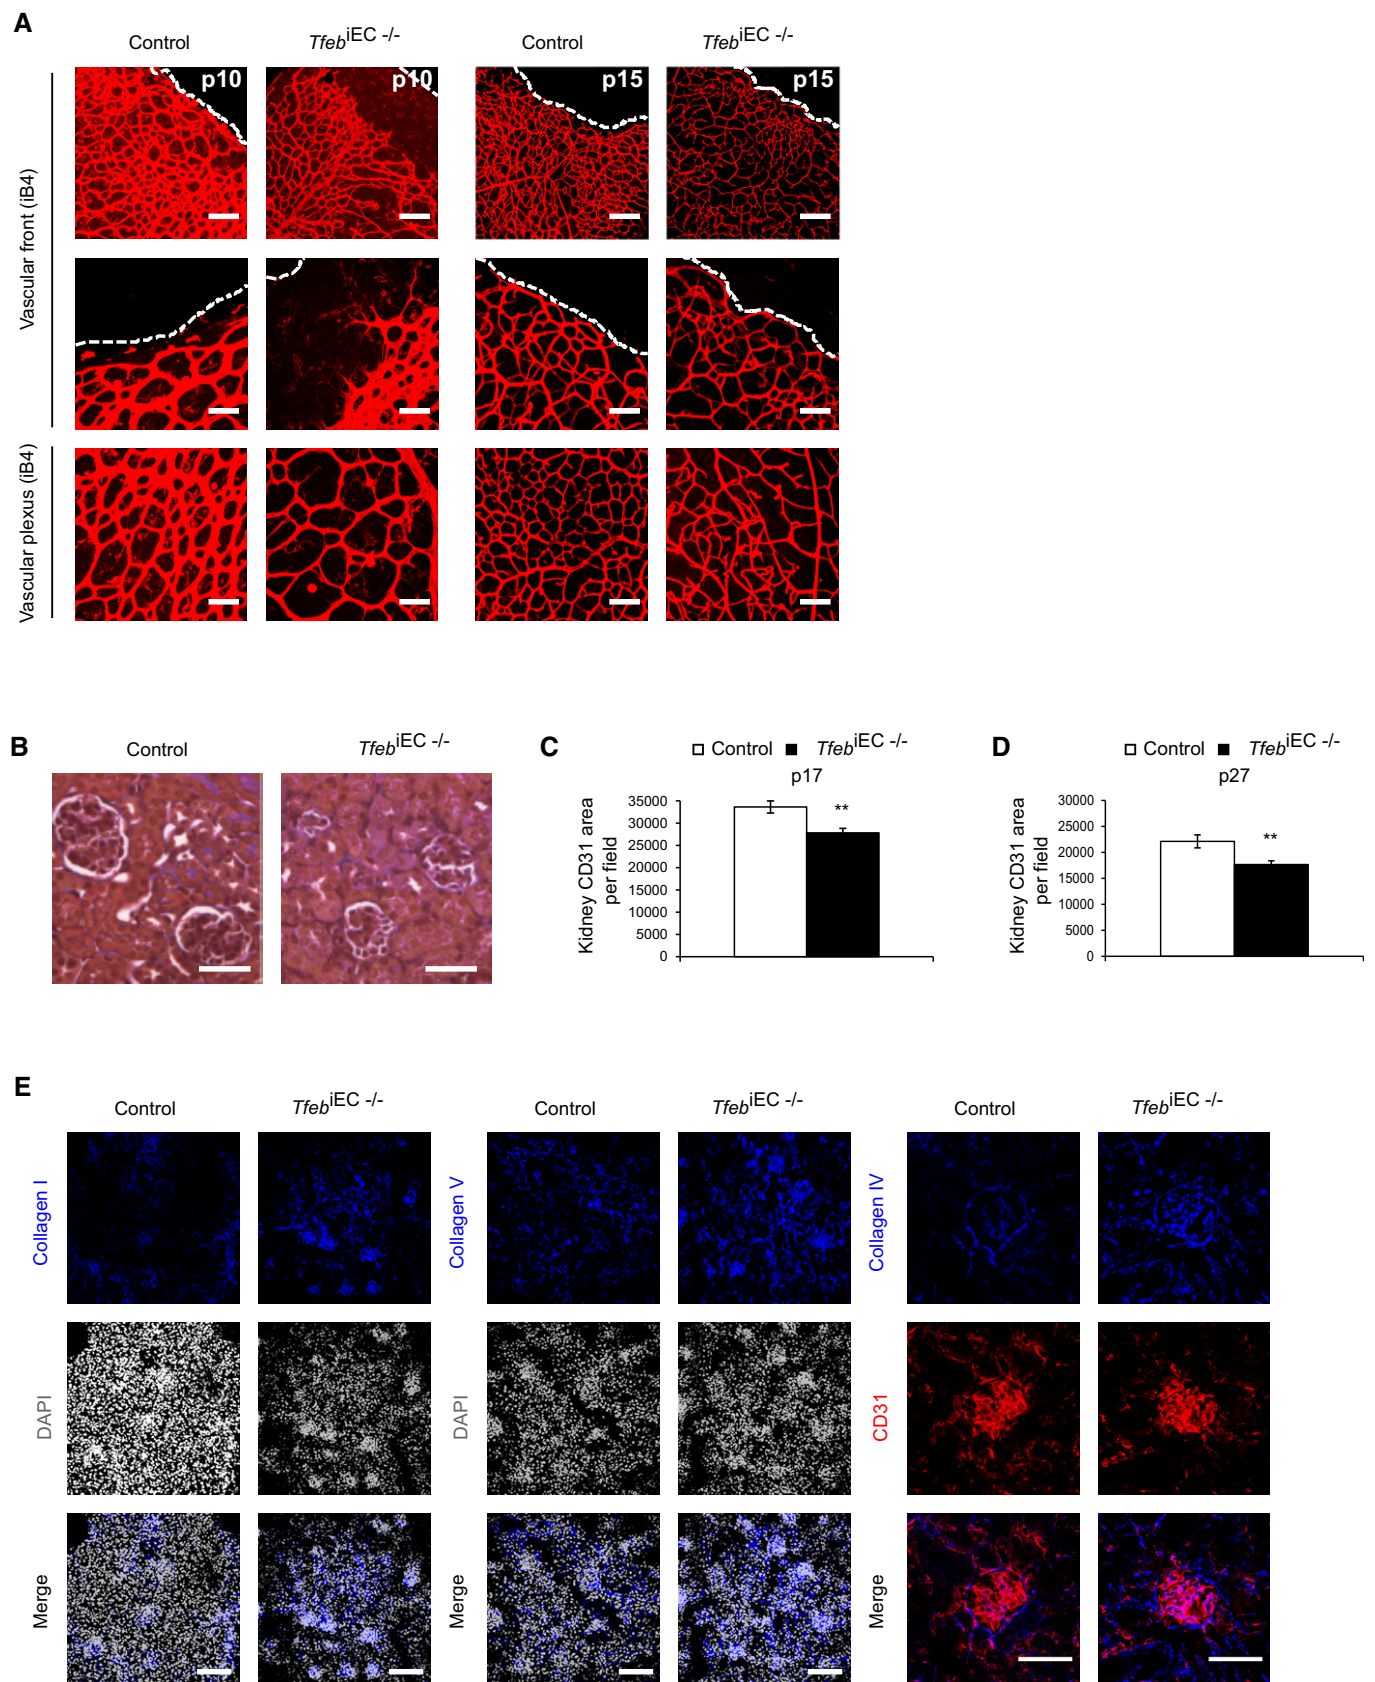

Figure EV3.

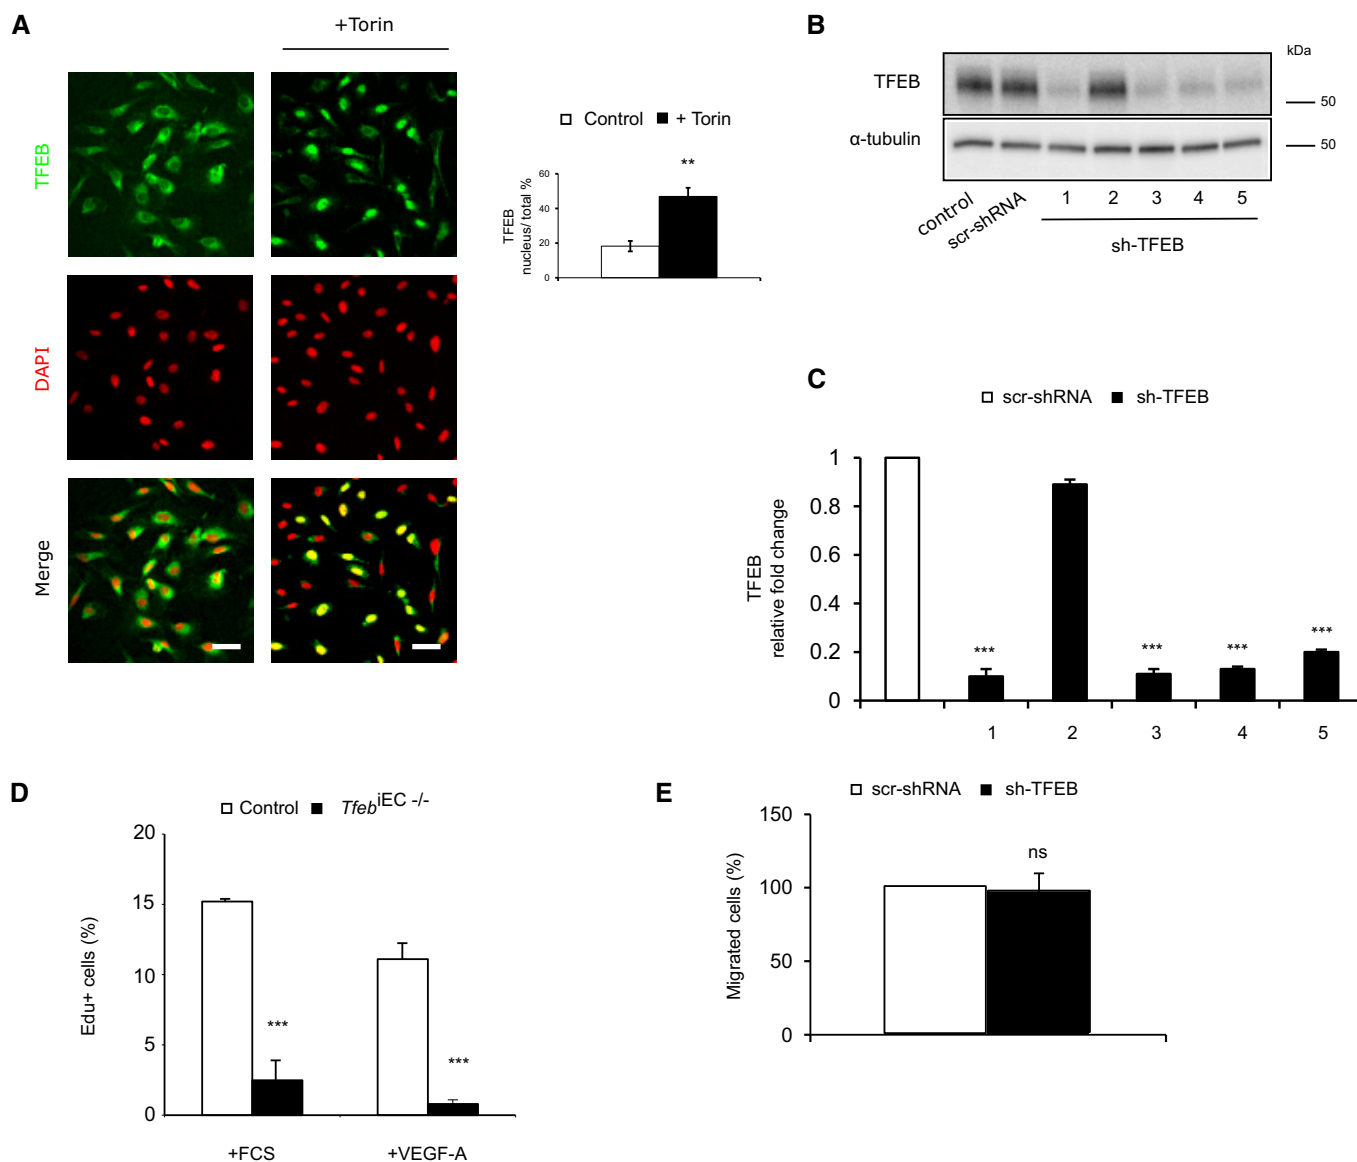

**Figure EV4. TFEB expression and regulation in human ECs. Additional effects of *Tfeb* deletion on human ECs.**

- A** mTOR inhibition activates TFEB nuclear translocation. Representative images of human ECs under basal conditions or after Torin stimulation (100 nM, 1 h) stained with anti-TFEB Ab and DAPI (scale bars: 20  $\mu$ m). Bar graphs indicate the percentage of TFEB positive nuclei versus total nuclei after Torin challenge ( $n = 3$ , mean  $\pm$  SEM;  $^{**}P < 0.001$  versus control cells by Student's *t*-test).
- B, C** Characterization of TFEB shRNA ( $n = 3$ ). (B) Western blot of TFEB in human ECs carrying five different commercial sh-TFEB RNAs (1-5) or the appropriate control (scr-shRNA) transduced by pLKO lentivirus vector. (C) *TFEB* mRNA expression analyzed by qPCR in ECs carrying the different TFEB shRNAs (1-5). Data are expressed as relative fold-change compared with scr-shRNA after normalization to the housekeeping gene TBP ( $n = 3$ , mean  $\pm$  SEM;  $^{***}P < 0.0001$  by Student's *t*-test).
- D** *TFEB* silencing reduced murine EC proliferation. Representative graph of lung ECs isolated from control and *Tfeb*<sup>IEC-/-</sup> mice ECs treated for 24 h with FCS (20%) or VEGF-A (30 ng/ml). DNA incorporation of EdU was detected by flow cytometry. The percentage of proliferating cells is indicated ( $n = 4$ , mean  $\pm$  SEM;  $^{***}P < 0.0001$  versus ECs derived from control mice by Student's *t*-test).
- E** *TFEB* silencing does not affect human EC migration. Bar graph indicates the percentage of migrated sh-TFEB and scr-shRNA ECs stimulated with VEGF-A (30 ng/ml, 5 h;  $n = 6$ , mean  $\pm$  SEM,  $P = ns$  versus scr-shRNA by Student's *t*-test).

Source data are available online for this figure.

**Figure EV5. TFEB gene regulation in human ECs.**

- A Volcano plots of human gene expression showing fold-change and *P*-value data comparing human sh-TFEB and scr-shRNA ECs. Red: up-regulated genes; green: down-regulated genes.
- B Characterization of TFEBs142A overexpression in human ECs. Representative images of human ECs transduced with pTRIPZ-TFEBs142A inducible lentivirus (scale bars: 20  $\mu$ m) after transgene induction with doxycycline (0.5  $\mu$ g/ml, 3 h; TFEBs142A) or not (control) and stained with anti-TFEB Ab and DAPI. Bar graph indicates the quantity of cytosolic and nuclear TFEB as ratio between TFEBs142A and control ECs ( $n = 10$ , mean  $\pm$  SEM, \*\* $P < 0.0001$  and \*\*\* $P < 0.0001$  by Student's *t*-test).
- C Representative genomic view of the TFEB ChIP-seq analysis. The TFEB ChIP-seq plot shows distinct binding peaks with respect to the IgG ChIP-seq.
- D Comparison of the TFEB-bound genomic regions with respect to the other indicated ChIP-seq regions taken from the literature. TFEB correlates with open chromatin (DNase) and with transcription factors known to be associated with active gene promoters (FOS, JUN, RNA PolIII, MYC).
- E Enrichment of the E-box DNA-binding sequence of TFEB (CACGTG) on 70.9% of TFEB target genes in human ECs.
- F Comparison of expression values in human ECs between TFEB-bound and unbound genes. Box plots are median-centered. The end of the box shows the upper and lower quartiles. The whiskers line shows the highest and lowest value excluding outliers.
- G DNA methylation analysis of the TFEB-bound regions in human ECs using 450K Illumina microarray data from the literature (methylation status of 6,461 CpG has been analyzed).
- H Genomic localization of TFEB-bound regions in human ECs.
- I GSEA analysis of TFEB-bound genes comparing human sh-TFEB and scr-shRNA ECs microarray data. Enrichment plot shows modulated TFEB-bound genes.
- J TFEB overexpression increased EC proliferation. Representative graph of control and TFEBs142A ECs treated for 24 h with FCS (20%). DNA incorporation of EdU was detected by flow cytometry. The percentage of proliferating cells is indicated ( $n = 4$ , mean  $\pm$  SEM; \* $P < 0.01$  versus control ECs by Student's *t*-test).
- K, L (K) qPCR and (L) immunoblots showing modulation of *CDK4* after TFEB overexpression in ECs. (K) Data are expressed as relative fold-change compared with the expression in control cells after normalization to the housekeeping gene TBP ( $n = 3$ , mean  $\pm$  SEM; \*\*\* $P < 0.0001$  by Student's *t*-test). (L) Immunoblots of total lysates from control and TFEBs142A ECs probed with specific Abs. The bar graph shows the densitometric analysis expressed as % of CDK4 in TFEBs142A versus control ECs after the normalization with  $\alpha$ -tubulin ( $n = 3$ , mean  $\pm$  SEM; \*\*\* $P < 0.0001$  versus scr-shRNA by Student's *t*-test).

Source data are available online for this figure.

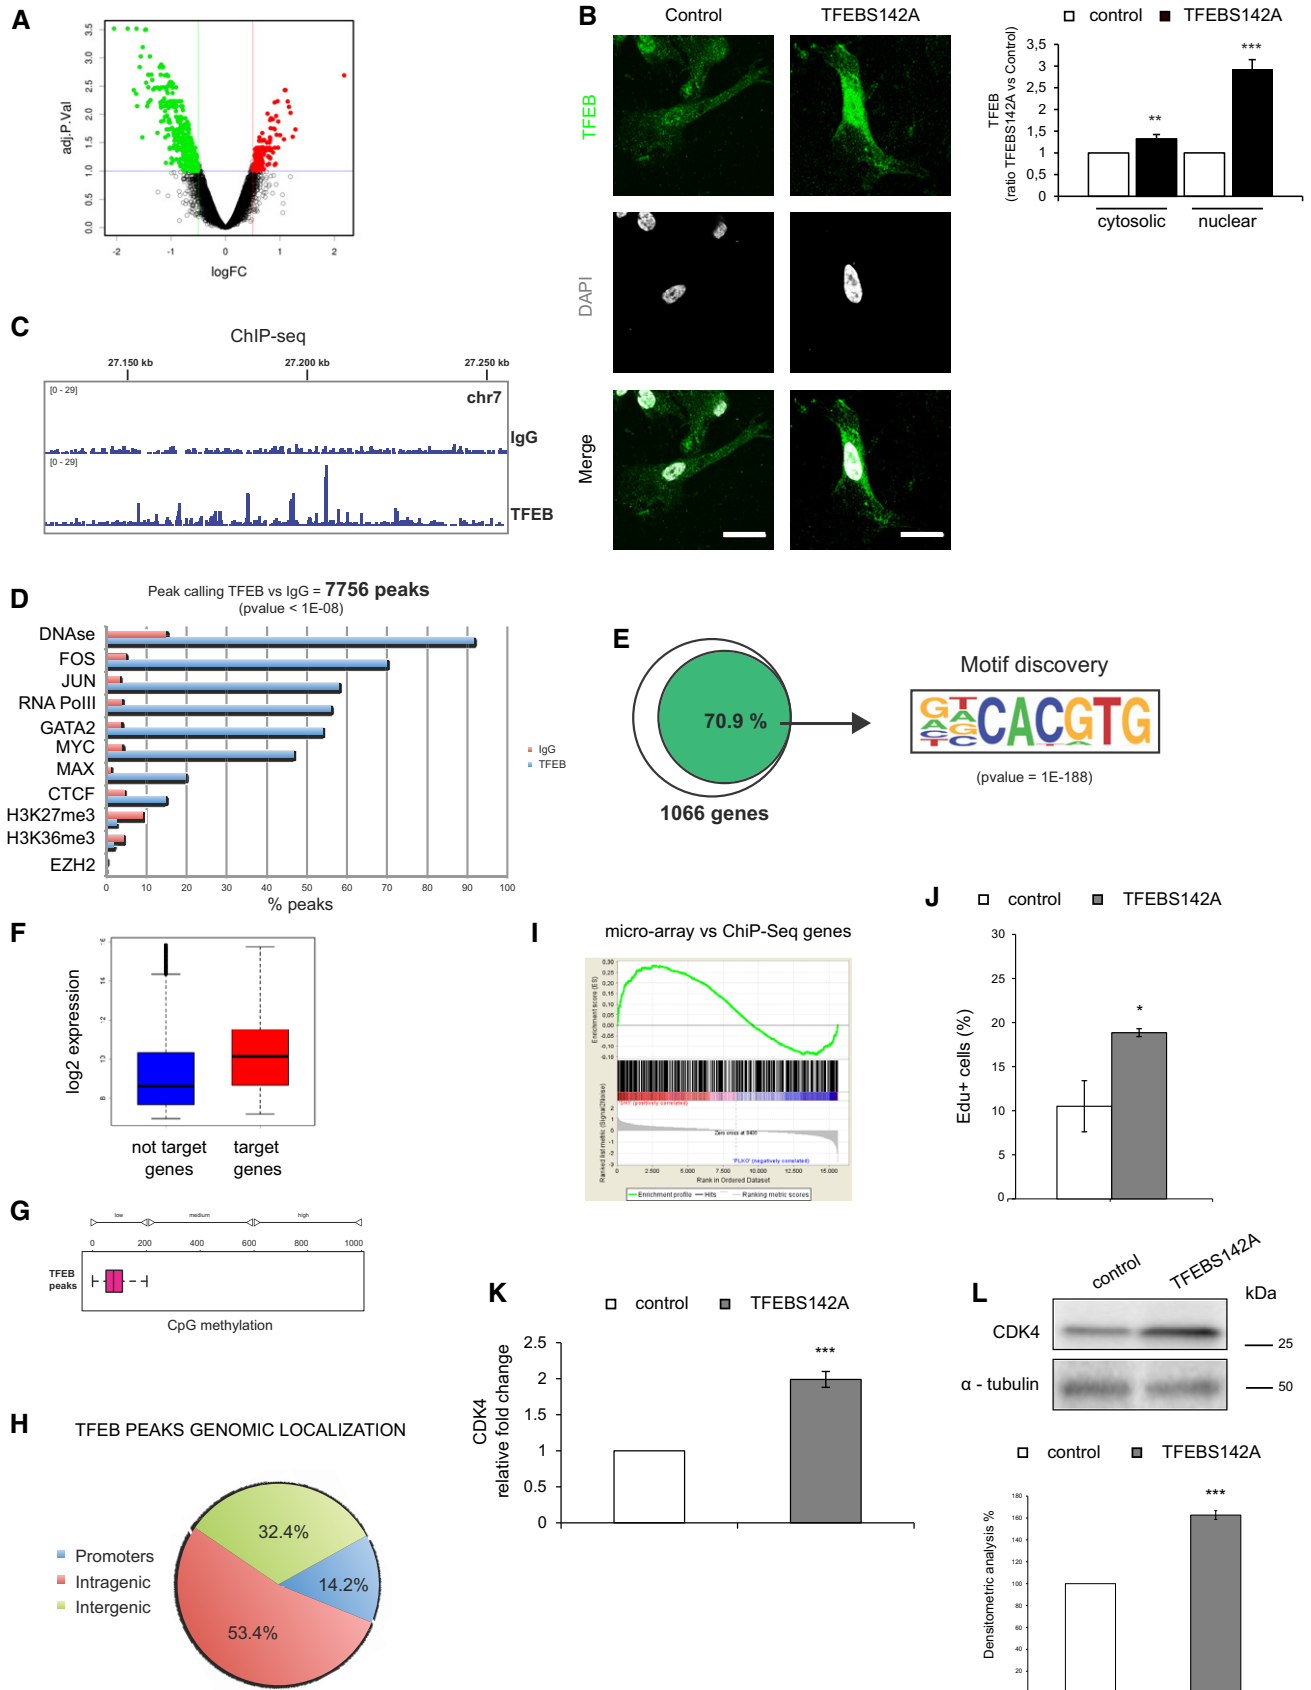

Figure EV5.
