# Supplementary figures and images for: TFEB controls vascular development by regulating the proliferation of endothelial cells
Source: PubMed Central journal article supplement — EMBO J. 2018 Dec 27;38(3):e98250. doi: 10.15252/embj.201798250 (PMC6356157; doi:10.15252/embj.201798250), 2018-12-27

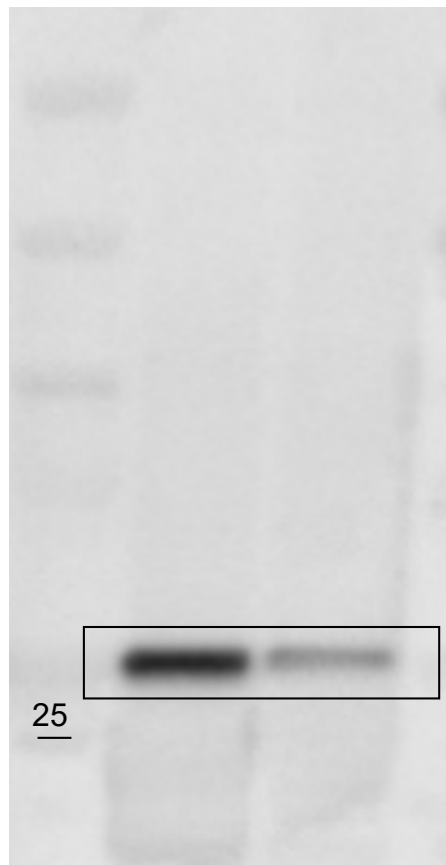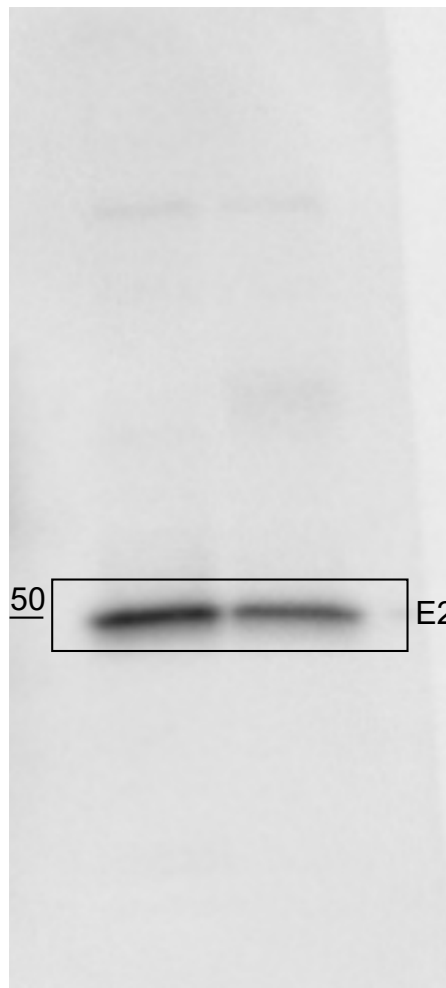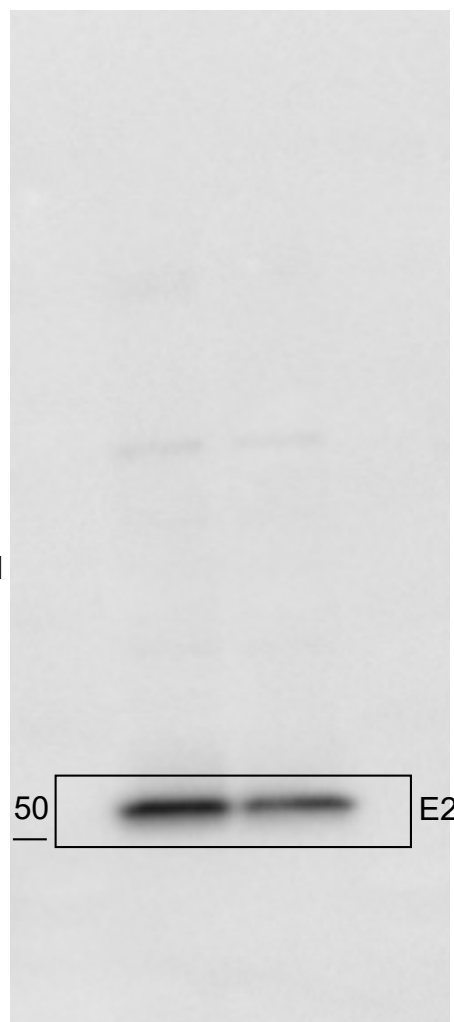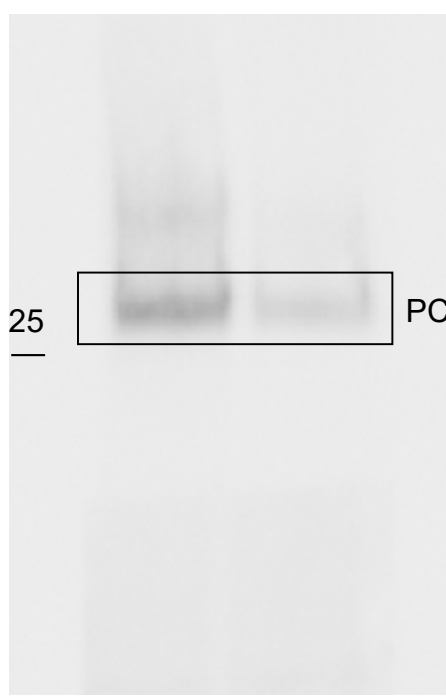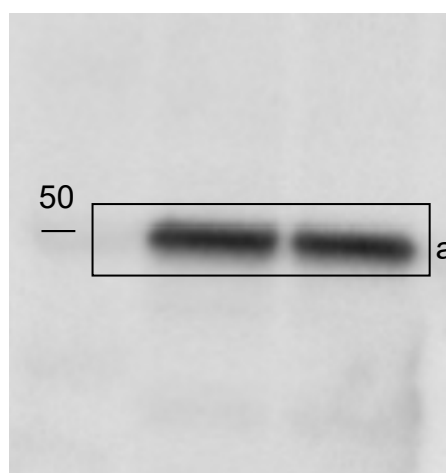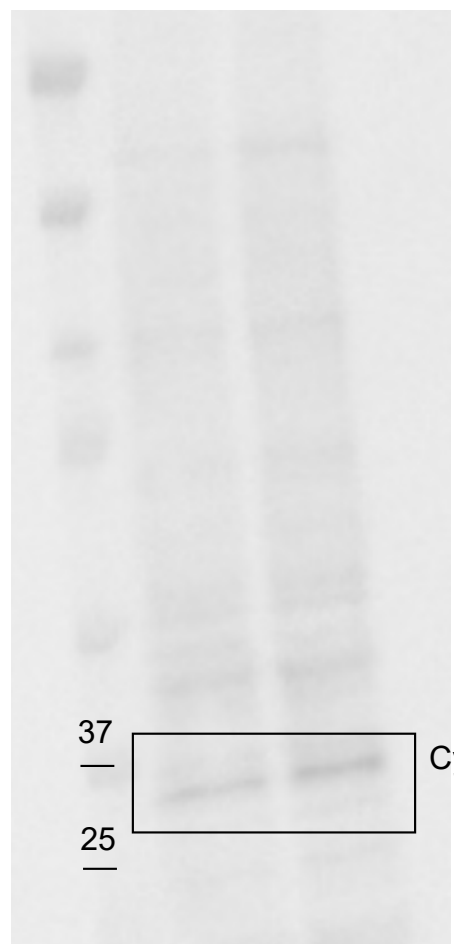

FIG.4 PANEL C

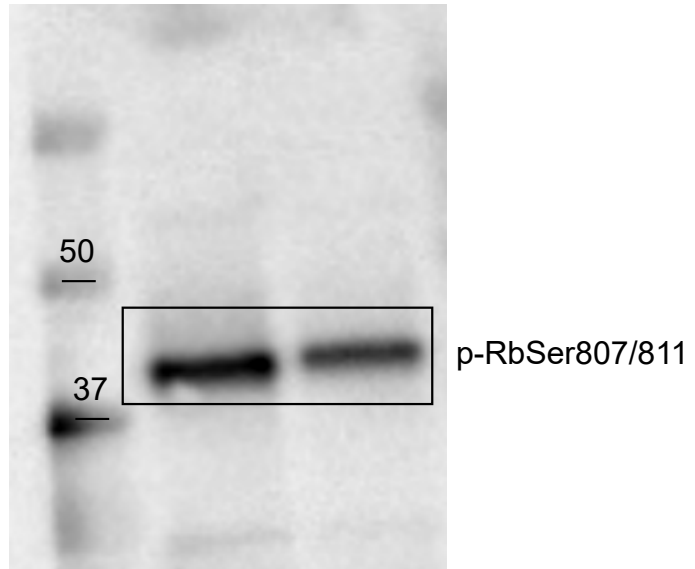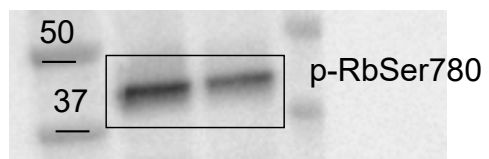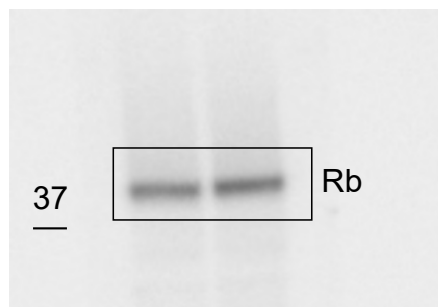

FIG.4 PANEL H

Supplement: EMBJ-38-e98250-s004.pdf [file EMBJ-38-e98250-s004.pdf]

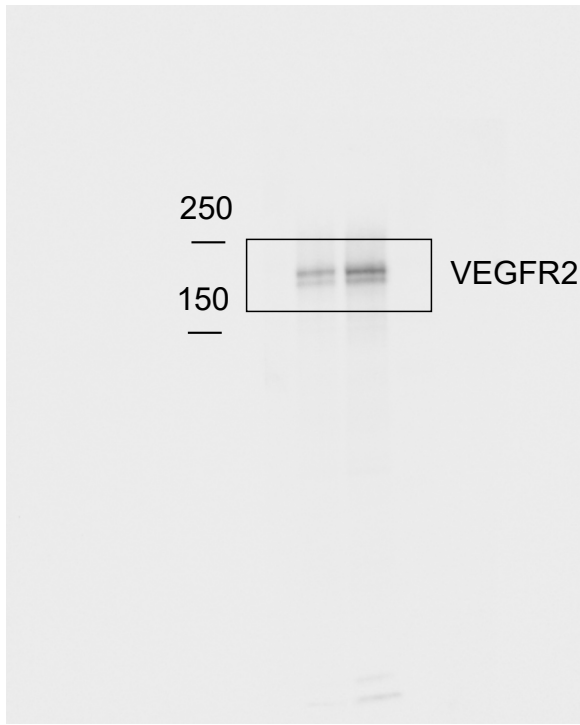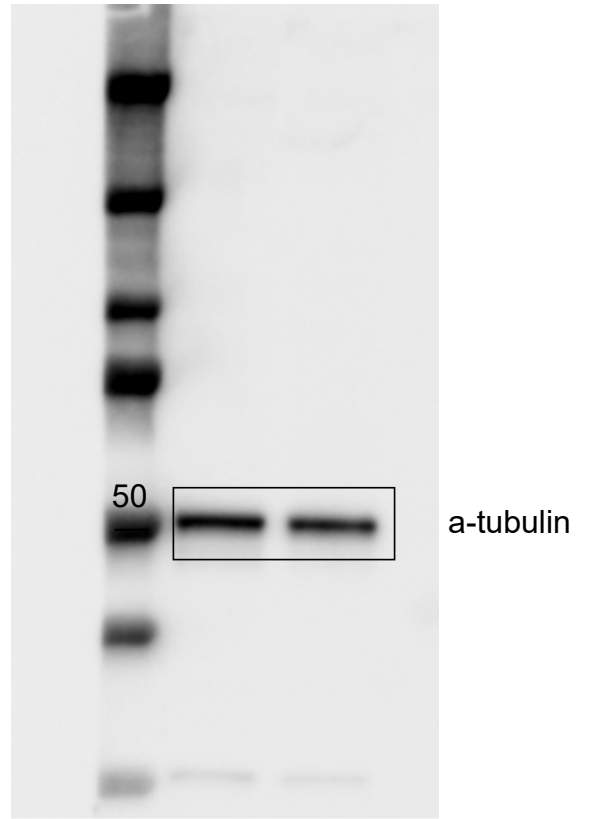

Supplement: EMBJ-38-e98250-s005.pdf [file EMBJ-38-e98250-s005.pdf]

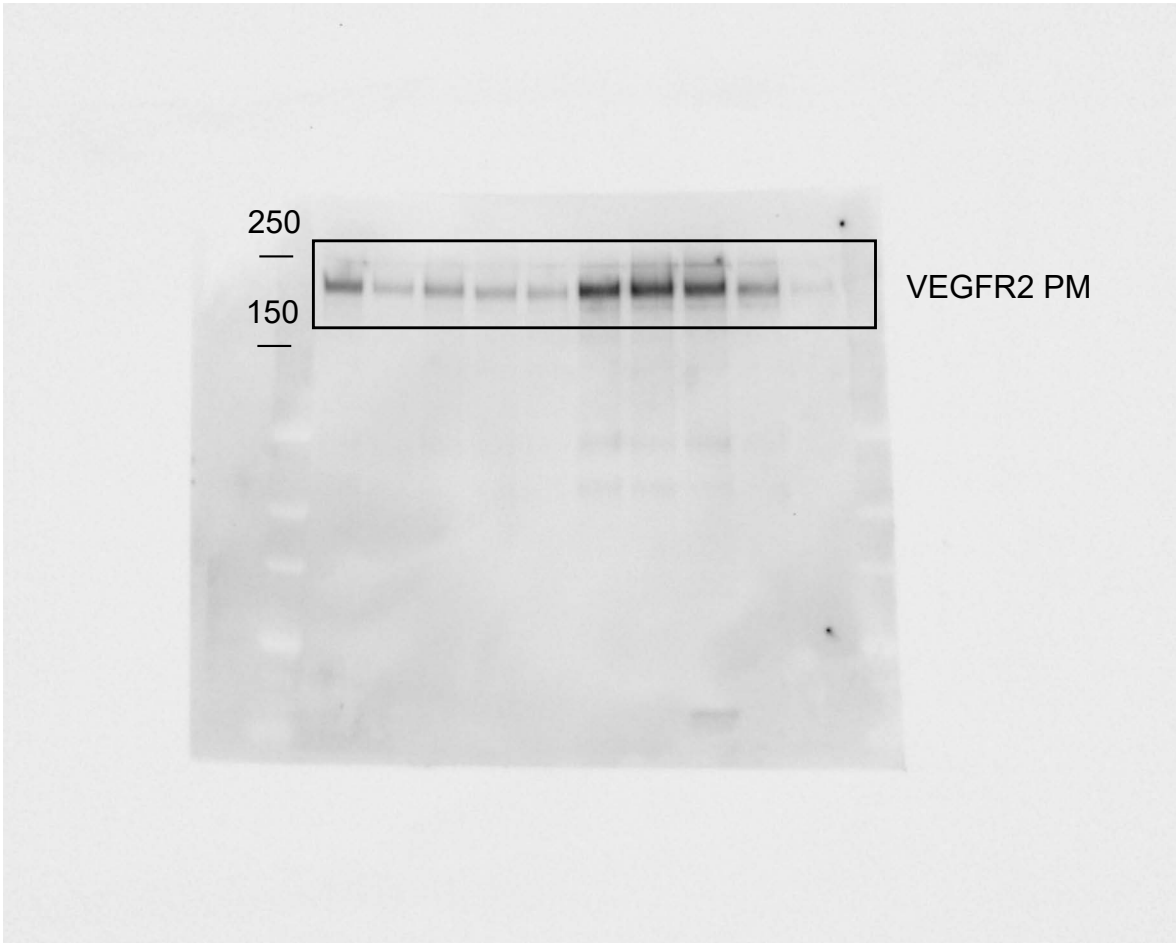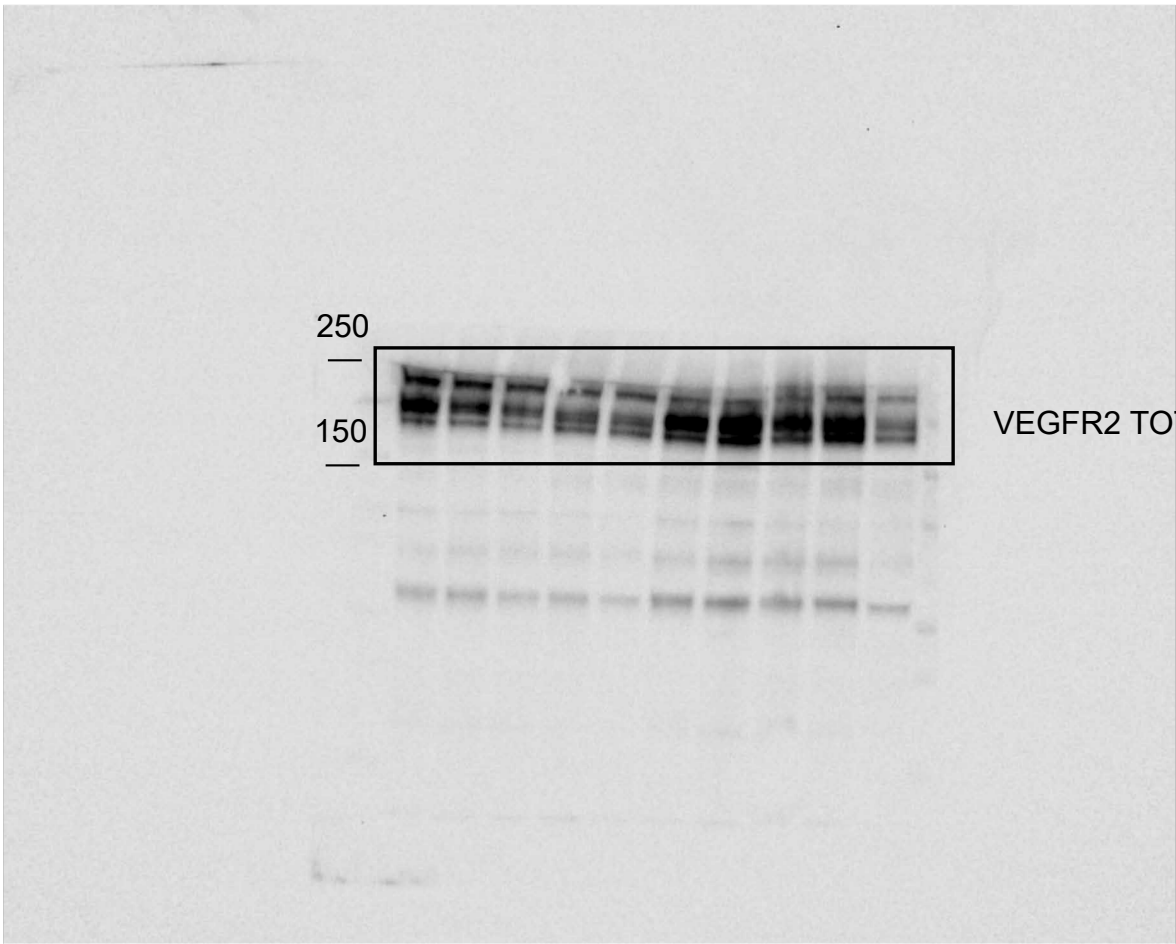

FIGURE 6 PANEL C

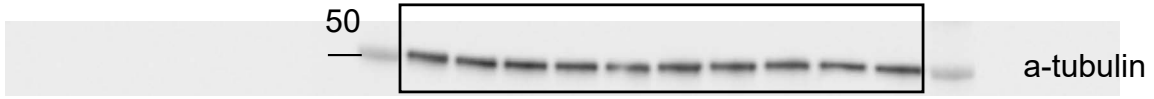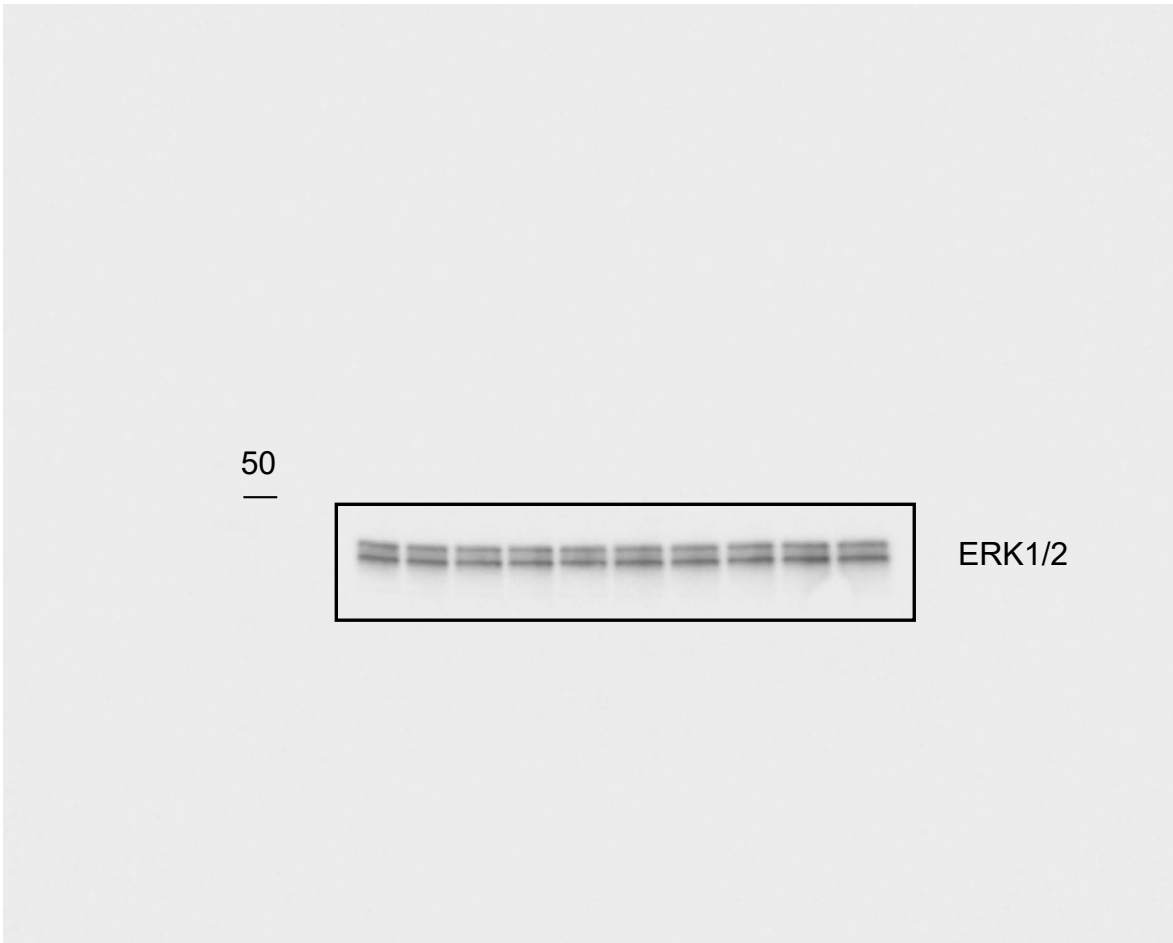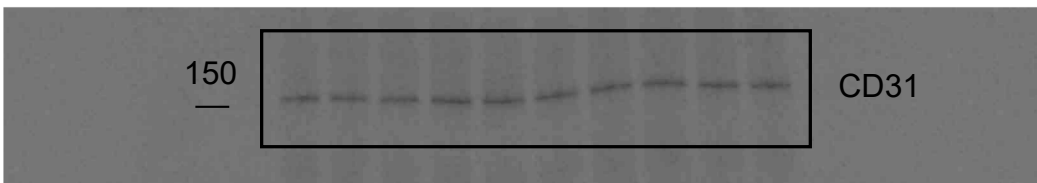

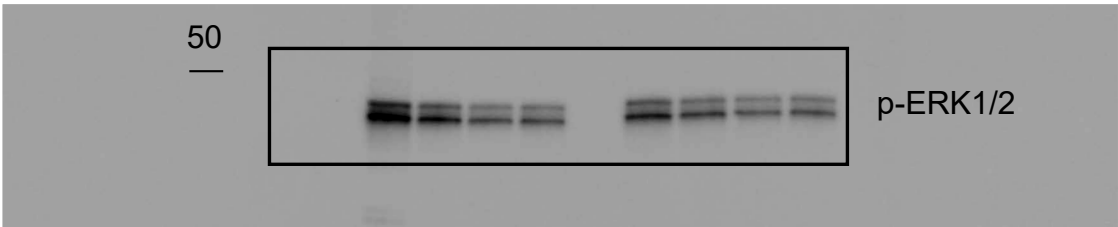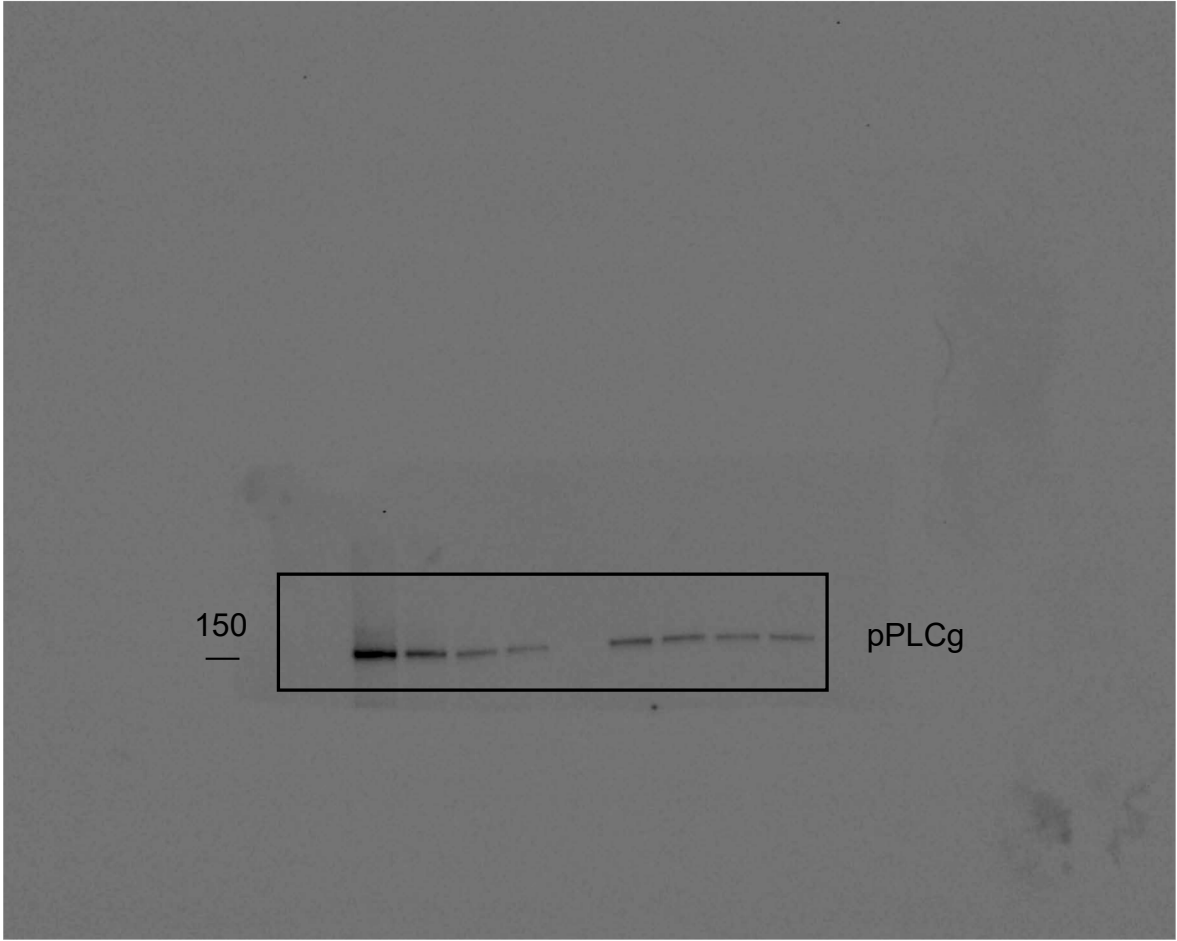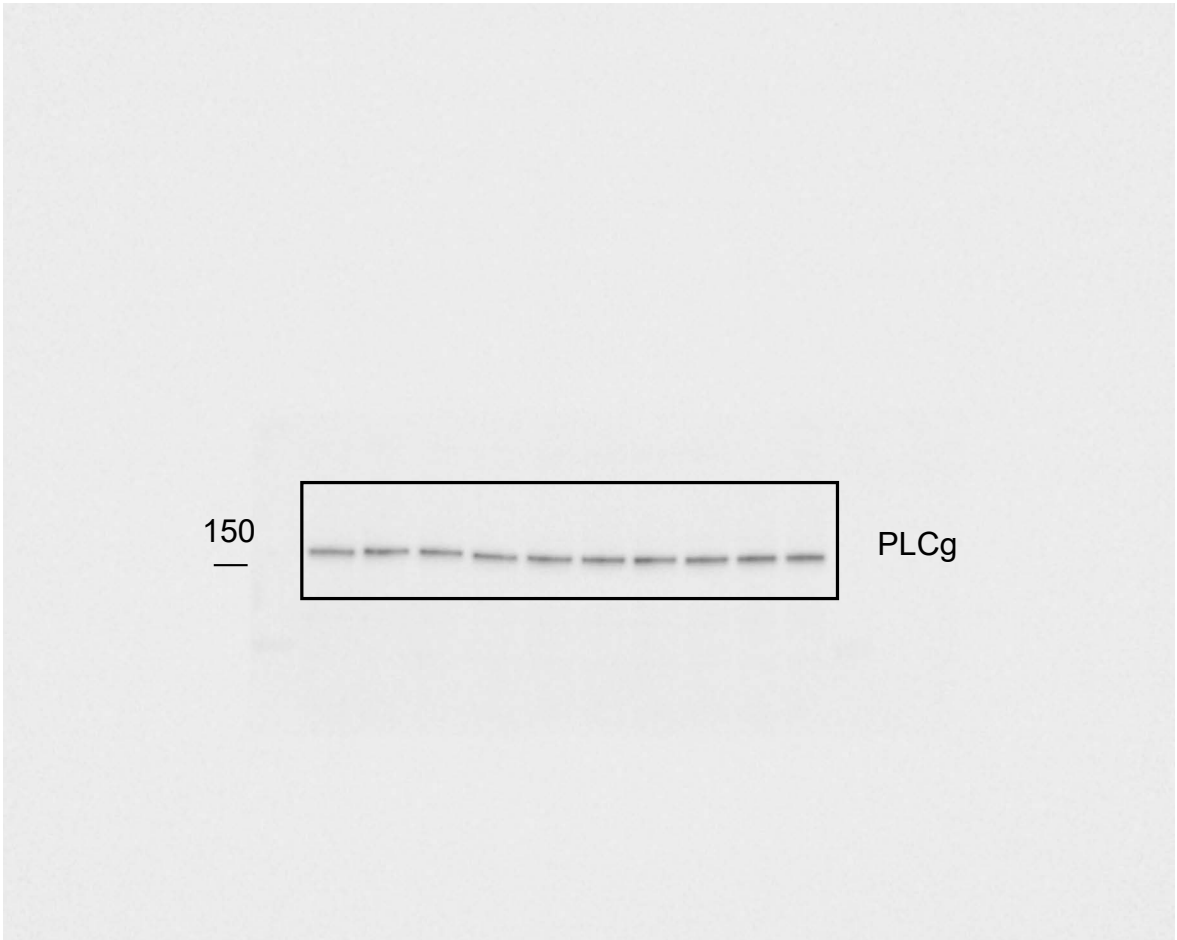

FIGURE 6 PANEL C

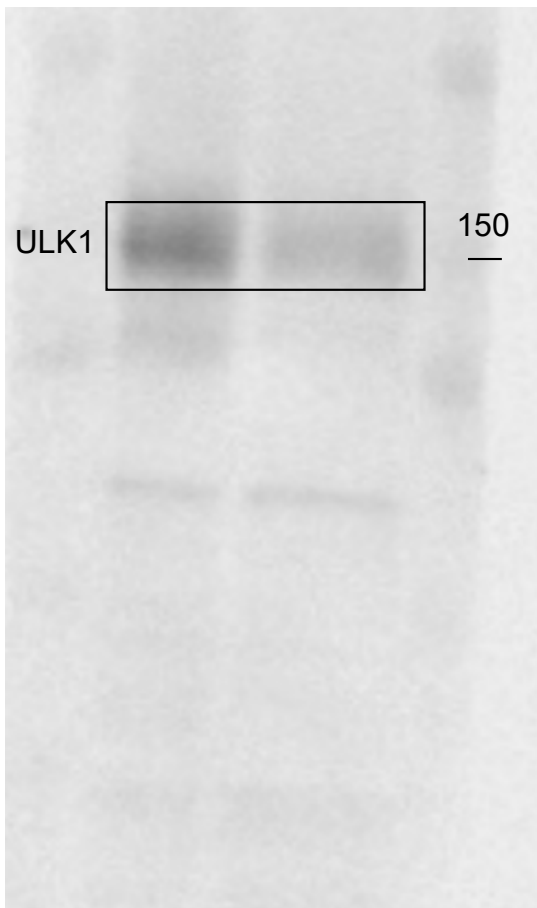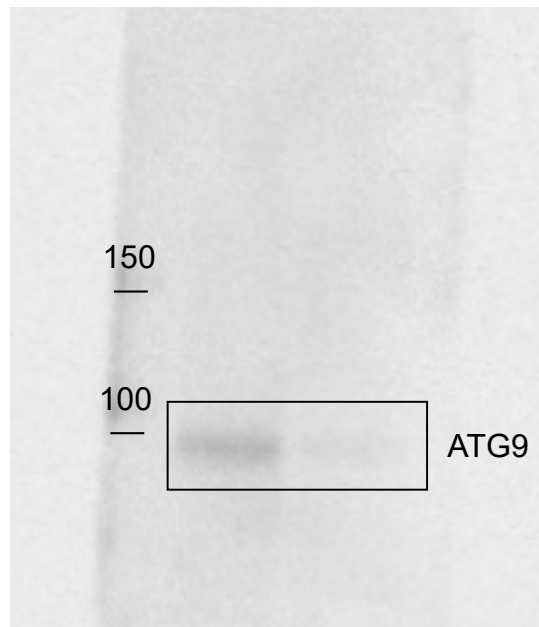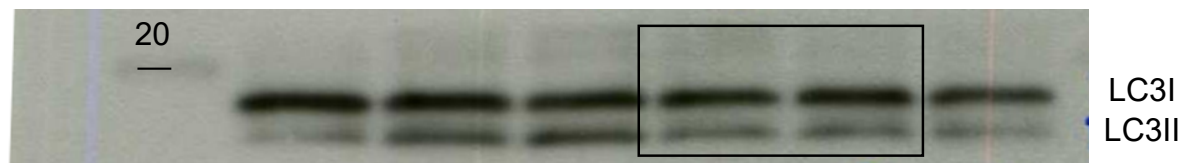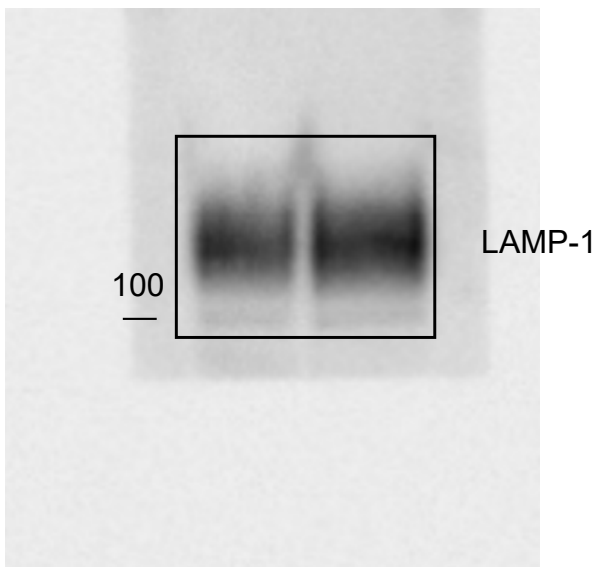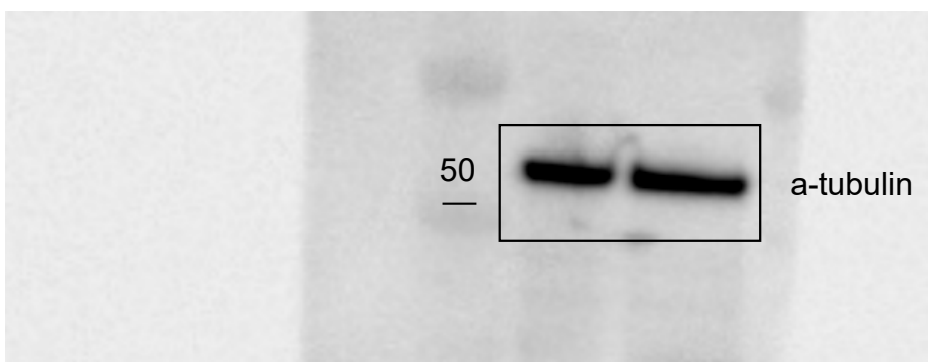

FIGURE 6 PANEL E

Supplement: EMBJ-38-e98250-s006.pdf [file EMBJ-38-e98250-s006.pdf]

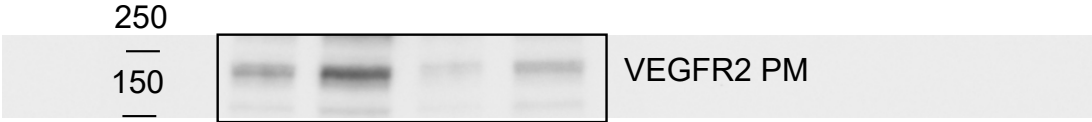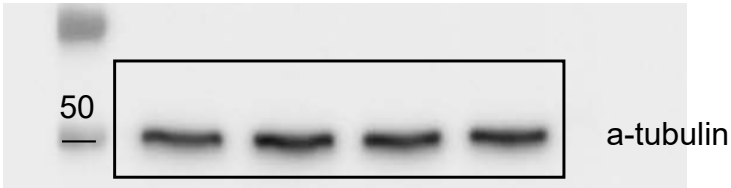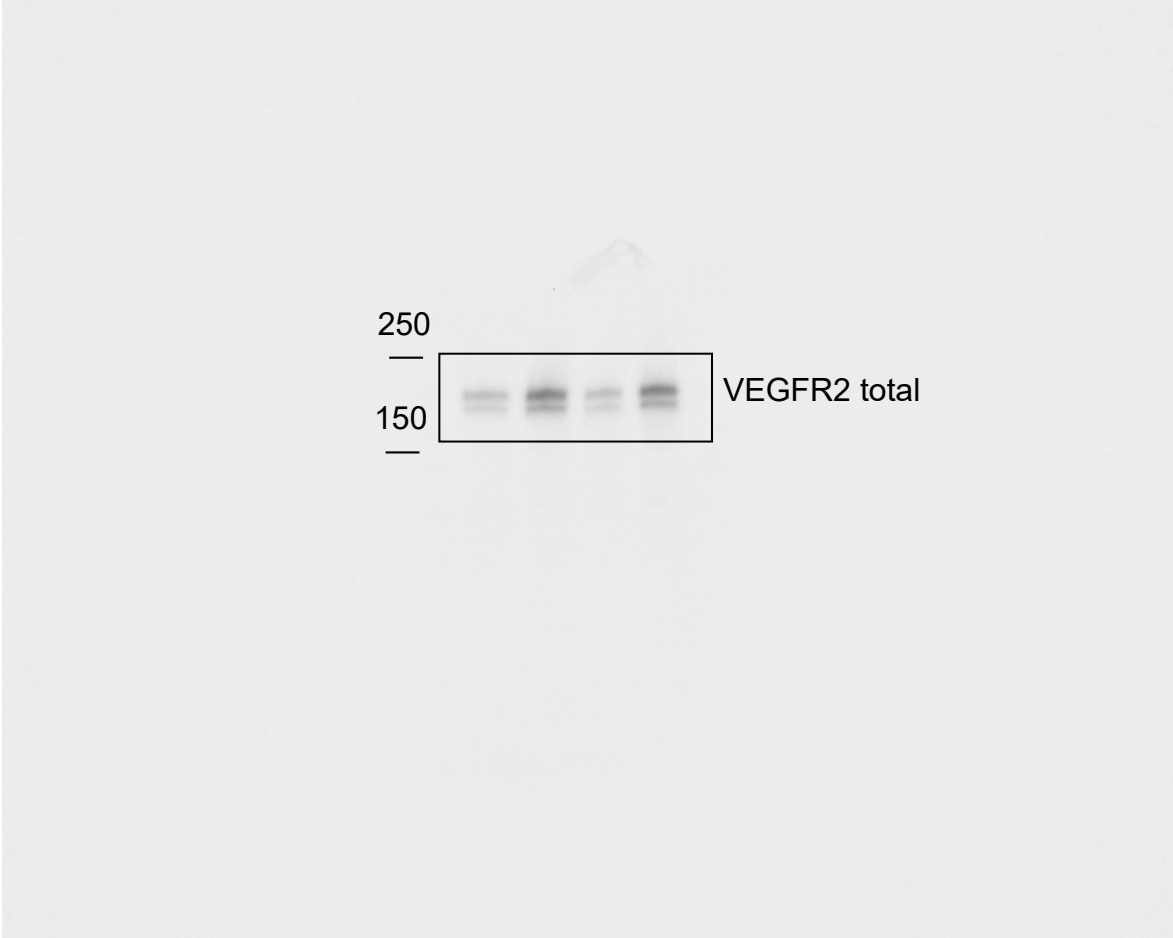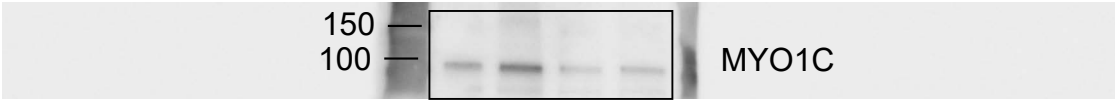

FIGURE 7 PANEL D

Supplement: EMBJ-38-e98250-s007.pdf [file EMBJ-38-e98250-s007.pdf]

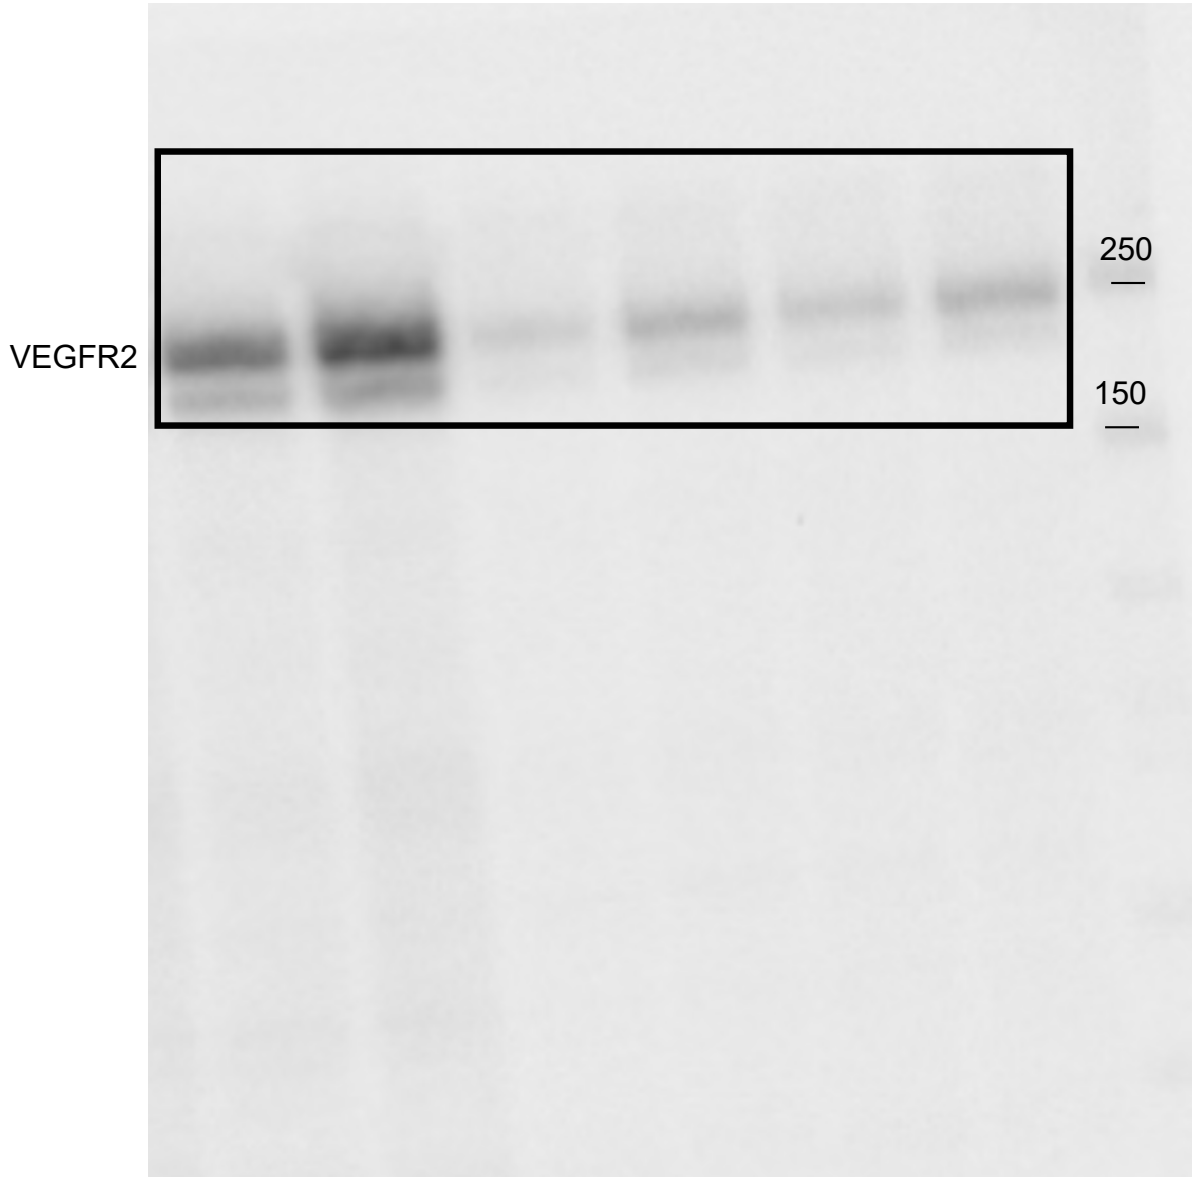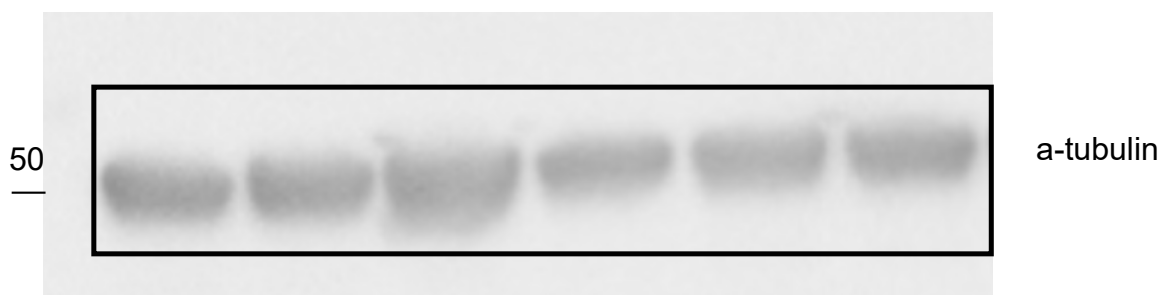

FIGURE 8 PANEL E

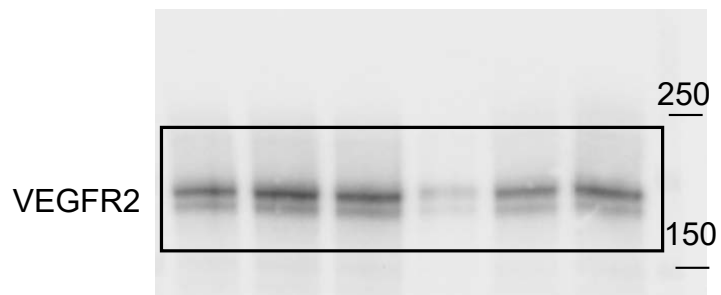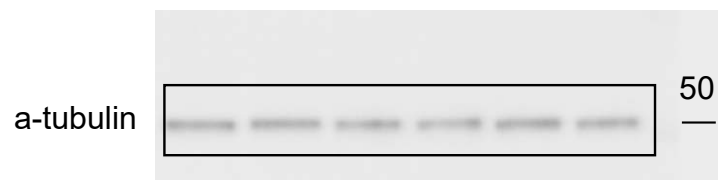

Supplement: EMBJ-38-e98250-s008.pdf [file EMBJ-38-e98250-s008.pdf]
